# Supplementary material
Source: PubMed Central journal article supplement (PMC2703815)

## Supporting Information

### **Efficient Traceless Solid-Phase Synthesis of 3,4-Dihydropyrazino[1,2-b]indazoles and their 6-Oxides**

Naděžda Pudelová and Viktor Krchňák\*

*Department of Chemistry and Biochemistry, 251 Nieuwland Science Hall, University of Notre Dame, Notre Dame, Indiana 46556, USA*

\*Corresponding author. E-mail: [vkrcnak@nd.edu](mailto:vkrcnak@nd.edu).

#### Table of Contents

|                                                         |     |
|---------------------------------------------------------|-----|
| 1. General Information .....                            | S2  |
| 2. Analytical data of synthetic compounds.....          | S3  |
| 3. <sup>1</sup> H and <sup>13</sup> C NMR spectra ..... | S17 |

## Material and Methods

Solvents were used without further purification. The Wang resin (100-200 mesh, 1% DVB, 1.0 mmol/g) was used. Synthesis was carried out on Domino Blocks ([www.torvig.com](http://www.torvig.com)) in disposable polypropylene reaction vessels.

All reactions were carried out at ambient temperature (~21 °C) unless stated otherwise. The volume of wash solvent was 10 mL per 1 g of resin. For washing, resin slurry was shaken with the fresh solvent for at least 1 min before changing the solvent. After adding a reagent solution, the resin slurry was manually vigorously shaken to break any potential resin clumps. Resin-bound intermediates were dried by a stream of nitrogen for prolonged storage and/or quantitative analysis.

For the LC/MS analysis a sample of resin (~5 mg) was treated by 50% TFA in DCM, the cleavage cocktail was evaporated by a stream of nitrogen, and cleaved compounds extracted into 1 mL of MeOH.

The LC/MS analyses were carried out using a 3 x 50 mm C18 reverse phase column. Mobile phases: 10 mM ammonium acetate in HPLC grade water (A) and HPLC grade acetonitrile (B). A gradient was formed from 5% to 80% of B in 10 minutes at 0.7 mL/min. The MS electrospray source operated at capillary voltage 3.5 kV and a desolvation temperature 300 °C.

Purification was carried out on C18 column 19 x 100 mm, 5 um particles, gradient was formed from 10 mM aqueous ammonium acetate and acetonitrile, flow rate 15 mL/min.

*NMR spectroscopy.* All  $^1\text{H}$  and  $^{13}\text{C}$ -NMR experiments were performed at magnetic field strengths of 7.05 T corresponding to  $^1\text{H}$  resonance frequencies of 299.89 MHz, and at ambient temperature (~21 °C).  $^1\text{H}$  spectra and  $^{13}\text{C}$  spectra were referenced relative to the signal of DMSO ( $^1\text{H}$   $\delta$  = 2.49 ppm,  $^{13}\text{C}$   $\delta$  = 39.50 ppm ).

## Analytical data of synthetic compounds

### 1-*p*-Tolyl-3,4-dihydropyrazino[1,2-*b*]indazole 6-oxide 7(1,1,1)

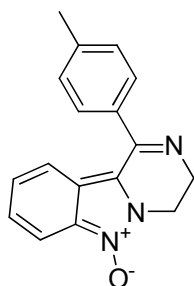

Yield 41.3 mg (72%). ESI-MS  $m/z = 278$ ,  $[M+H]^+$ .  $^1\text{H}$  NMR (300 MHz,  $\text{DMSO-}d_6$ )  $\delta$ : 2.42 (s, 3 H) 4.11 (t,  $J=6.91$  Hz, 2 H) 4.42 (t,  $J=6.77$  Hz, 2 H) 7.00 (d,  $J=8.56$  Hz, 1 H) 7.16 - 7.24 (m, 1 H) 7.29 - 7.38 (m, 3 H) 7.59 (d,  $J=8.01$  Hz, 2 H) 7.73 (d,  $J=8.84$  Hz, 1 H).  $^{13}\text{C}$  NMR (75 MHz,  $\text{DMSO-}d_6$ )  $\delta$ : 21.77, 38.08, 47.57, 110.80, 113.69, 115.51, 120.77, 126.61, 126.84, 129.11, 129.56, 129.72, 135.05, 140.85, 156.34. HRMS (FAB)  $m/z$  calcd for  $\text{C}_{17}\text{H}_{16}\text{N}_3\text{O}$   $[M + H]^+$  278.1293, found 278.1316

### 1-(4-Chlorophenyl)-3,4-dihydropyrazino[1,2-*b*]indazole 6-oxide 7(1,1,2)

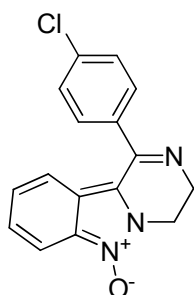

Yield 26.0 mg (43%). ESI-MS  $m/z = 298$ ,  $[M+H]^+$ .  $^1\text{H}$  NMR (300 MHz,  $\text{DMSO-}d_6$ )  $\delta$ : 4.18 (t,  $J=6.77$  Hz, 2 H) 4.63 (t,  $J=6.63$  Hz, 2 H) 7.04 (d,  $J=8.29$  Hz, 1 H) 7.41 - 7.54 (m, 2 H) 7.71 - 7.76 (m, 2 H) 7.76 - 7.81 (m, 2 H) 7.91 (d,  $J=8.29$  Hz, 1 H).  $^{13}\text{C}$  NMR (75 MHz,  $\text{DMSO-}d_6$ )  $\delta$ : 39.48, 44.16, 109.99, 114.70, 120.40, 127.78, 129.36, 129.92, 130.94, 131.41, 131.85, 137.87, 155.04. HRMS (FAB)  $m/z$  calcd for  $\text{C}_{16}\text{H}_{13}\text{ClN}_3\text{O}$   $[M + H]^+$  298.0747, found 298.0734

### 1-(4-Methoxyphenyl)-3,4-dihydropyrazino[1,2-*b*]indazole 6-oxide 7(1,1,3)

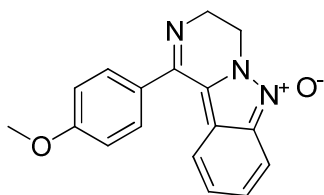

Yield 30.1 mg (50%). ESI-MS  $m/z = 294$ ,  $[M+H]^+$ .  $^1H$  NMR (300 MHz, DMSO- $d_6$ )  $\delta$ : 3.89 (s, 3 H) 4.13 (t,  $J=6.49$  Hz, 2 H) 4.65 (t,  $J=6.49$  Hz, 2 H) 7.16 (d,  $J=7.73$  Hz, 1 H) 7.21 (d,  $J=8.84$  Hz, 2 H) 7.49 (dd,  $J=9.25, 7.60$  Hz, 2 H) 7.76 (d,  $J=8.84$  Hz, 2 H) 7.92 (d,  $J=7.73$  Hz, 1 H).  $^{13}C$  NMR (75 MHz, DMSO- $d_6$ )  $\delta$ : 39.80, 42.67, 56.46, 109.74, 114.91, 115.37, 120.44, 121.17, 123.76, 127.94, 130.48, 131.82, 132.46, 155.70, 163.91. HRMS (FAB)  $m/z$  calcd for  $C_{17}H_{16}N_3O_2$   $[M + H]^+$  294.1243, found 294.1228

**1-(4-Amino-3,5-dichlorophenyl)-3,4-dihydropyrazino[1,2-b]indazole 6-oxide 7(1,1,4)**

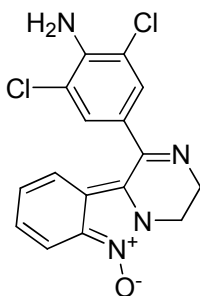

Yield 69.0 mg (96%). ESI-MS  $m/z = 347$ ,  $[M+H]^+$ .  $^1H$  NMR (300 MHz, DMSO- $d_6$ )  $\delta$ : 4.12 (t,  $J=6.35$  Hz, 2 H) 4.67 (t,  $J=6.49$  Hz, 2 H) 6.86 (s, 2 H) 7.38 - 7.44 (m, 1 H) 7.54 - 7.64 (m, 2 H) 7.76 (s, 2 H) 8.01 (dd,  $J=6.49, 2.62$  Hz, 2 H).  $^{13}C$  NMR (75 MHz, DMSO- $d_6$ )  $\delta$ : 37.17, 41.24, 109.27, 115.26, 116.88, 118.46, 120.28, 122.56, 128.32, 130.96, 131.46, 132.39, 147.03, 153.50. HRMS (FAB)  $m/z$  calcd for  $C_{16}H_{13}Cl_2N_4O$   $[M + H]^+$  347.0466, found 347.0482

**8-Methoxy-1-p-tolyl-3,4-dihydropyrazino[1,2-b]indazole 6-oxide 7(1,2,1)**

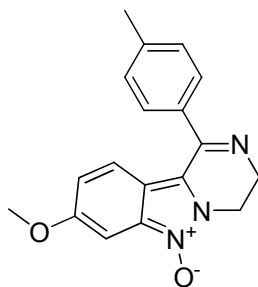

Yield (HPLC purified) 10.1 mg (16%). ESI-MS  $m/z = 308$ ,  $[M+H]^+$ . HRMS (FAB)  $m/z$  calcd for  $C_{18}H_{18}N_3O_2$   $[M + H]^+$  308.1399, found 308.1424

**1-(4-Chlorophenyl)-8-methoxy-3,4-dihydropyrazino[1,2-b]indazole 6-oxide 7(1,2,2)**

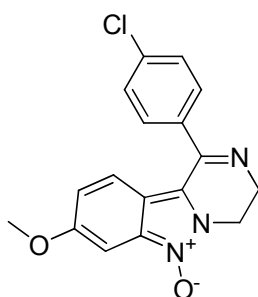

Yield (HPLC purified) 11.0 mg (16%). ESI-MS  $m/z = 328$ ,  $[M+H]^+$ . HRMS (FAB)  $m/z$  calcd for  $C_{17}H_{15}N_3O_2Cl$   $[M + H]^+$  328.0853, found 328.0868

**8-Methoxy-1-(4-methoxyphenyl)-3,4-dihydropyrazino[1,2-b]indazole 6-oxide 7(1,2,3)**

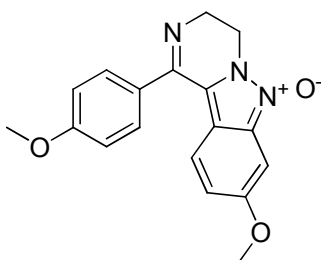

Yield (HPLC purified) 12.7 mg (20%). ESI-MS  $m/z = 324$ ,  $[M+H]^+$ .  $^1H$  NMR (300 MHz, DMSO- $d_6$ )  $\delta$ : 3.85 (s, 6 H) 4.07 (t,  $J=6.77$  Hz, 2 H) 4.36 (t,  $J=6.91$  Hz, 2 H) 6.89 (d,  $J=2.21$  Hz, 1 H) 6.92 - 6.97 (m, 1 H) 6.98 (d,  $J=2.21$  Hz, 1 H) 7.05 - 7.11 (m, 2 H) 7.60 - 7.67 (m, 2 H).  $^{13}C$  NMR (75 MHz, DMSO- $d_6$ )  $\delta$ : 37.93, 47.64, 56.05, 56.42, 91.38, 111.27, 111.32, 114.48, 121.24, 122.02, 130.15, 130.19, 130.67, 155.77, 158.84, 161.70. HRMS (FAB)  $m/z$  calcd for  $C_{18}H_{18}N_3O_3$   $[M + H]^+$  324.1348, found 324.1332

**1-(4-Amino-3,5-dichlorophenyl)-8-methoxy-3,4-dihydropyrazino[1,2-b]indazole 6-oxide  
7(1,2,4)**

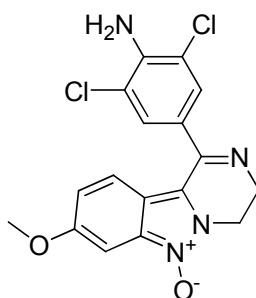

Yield (HPLC purified) 15.0 mg (20%). ESI-MS  $m/z = 377$ ,  $[M+H]^+$ . HRMS (FAB)  $m/z$  calcd for  $C_{17}H_{15}Cl_2N_4O_2$   $[M + H]^+$  377.0572, found 377.0564

**1-p-Tolyl-8-(trifluoromethyl)-3,4-dihydropyrazino[1,2-b]indazole 6-oxide 7(1,3,1)**

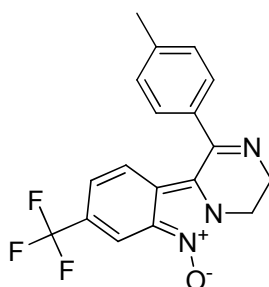

Yield 56.5 mg (78%). ESI-MS  $m/z = 346$ ,  $[M+H]^+$ .  $^1H$  NMR (300 MHz,  $DMSO-d_6$ )  $\delta$ : 2.47 (s, 3 H) 4.21 (t,  $J=6.77$  Hz, 2 H) 4.70 (t,  $J=6.63$  Hz, 2 H) 7.27 (d,  $J=8.84$  Hz, 1 H) 7.50 (d,  $J=8.01$  Hz, 2 H) 7.66 - 7.74 (m, 3 H) 8.33 (s, 1 H).  $^{13}C$  NMR (75 MHz,  $DMSO-d_6$ )  $\delta$ : 21.97, 42.97, 110.10, 113.41 (q,  $J=5.2$  Hz), 121.84, 122.43, 125.61 (d,  $J=2.1$  Hz), 126.05, 127.84 (q,  $J=32.4$  Hz), 128.84, 130.31, 130.53, 130.70, 144.56, 156.78. HRMS (FAB)  $m/z$  calcd for  $C_{18}H_{15}F_3N_3O$   $[M + H]^+$  346.1167, found 346.1140

**1-(4-Chlorophenyl)-8-(trifluoromethyl)-3,4-dihydropyrazino[1,2-b]indazole 6-oxide  
7(1,3,2)**

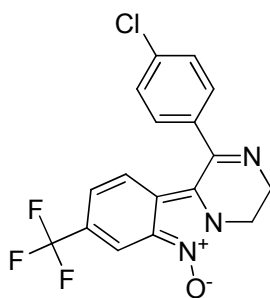

Yield 47.7 mg (62%). ESI-MS  $m/z = 366$ ,  $[M+H]^+$ . HRMS (FAB)  $m/z$  calcd for  $C_{17}H_{12}ClF_3N_3O$   
 $[M + H]^+$  366.0621, found 366.0584

**1-(4-Methoxyphenyl)-8-(trifluoromethyl)-3,4-dihydropyrazino[1,2-b]indazole 6-oxide 7(1,3,3)**

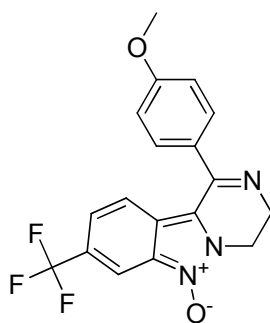

Yield 32.0 mg (81%). ESI-MS  $m/z = 362$ ,  $[M+H]^+$ . HRMS (FAB)  $m/z$  calcd for  $C_{18}H_{15}F_3N_3O_2$   
 $[M + H]^+$  362.1116, found 362.1155

**1-(4-Amino-3,5-dichlorophenyl)-8-(trifluoromethyl)-3,4-dihydropyrazino[1,2-b]indazole 6-oxide 7(1,3,4)**

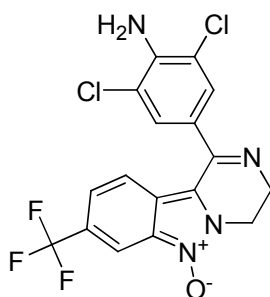

Yield 50.8 mg (58%). ESI-MS  $m/z = 415$ ,  $[M+H]^+$ . HRMS (FAB)  $m/z$  calcd for  $C_{17}H_{12}Cl_2F_3N_4O$   
 $[M + H]^+$  415.0340, found 415.0361

**8-Nitro-1-p-tolyl-3,4-dihydropyrazino[1,2-b]indazole 6-oxide 7(1,4,1)**

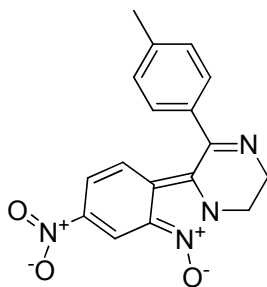

Yield 42.9 mg (60%). ESI-MS  $m/z = 323$ ,  $[M+H]^+$ . HRMS (FAB)  $m/z$  calcd for  $C_{17}H_{15}O_3N_4$   $[M + H]^+$  323.1144, found 323.1129

**1-(4-Chlorophenyl)-8-nitro-3,4-dihydropyrazino[1,2-b]indazole 6-oxide 7(1,4,2)**

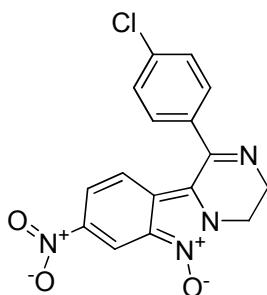

Yield 44.4 mg (59%). ESI-MS  $m/z = 343$ ,  $[M+H]^+$ . HRMS (FAB)  $m/z$  calcd for  $C_{16}H_{12}O_3N_4Cl$   $[M + H]^+$  343.0598, found 343.0608

**1-(4-Methoxyphenyl)-8-nitro-3,4-dihydropyrazino[1,2-b]indazole 6-oxide 7(1,4,3)**

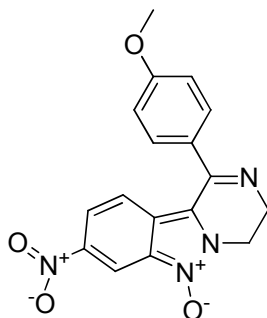

Yield 56.3 mg (75%). ESI-MS  $m/z = 339$ ,  $[M+H]^+$ .  $^1H$  NMR (300 MHz,  $DMSO-d_6$ )  $\delta$ : 3.93 (s, 3 H) 4.23 (t,  $J=6.63$  Hz, 2 H) 4.74 (t,  $J=6.49$  Hz, 2 H) 7.28 (d,  $J=8.84$  Hz, 2 H) 7.36 (d,  $J=9.39$  Hz, 1 H) 7.81 (d,  $J=8.84$  Hz, 2 H) 8.17 (dd,  $J=9.25, 2.07$  Hz, 1 H) 8.78 (d,  $J=1.93$  Hz, 1 H).  $^{13}C$  NMR (75 MHz,  $DMSO-d_6$ )  $\delta$ : 37.17, 56.31, 56.59, 110.01, 112.57, 115.01, 115.69,



122.20, 124.18, 130.88, 131.63, 132.93, 146.39, 156.84, 164.63. HRMS (FAB)  $m/z$  calcd for  $C_{17}H_{15}N_4O_4$   $[M + H]^+$  339.1093, found 339.1137

**1-(4-Amino-3,5-dichlorophenyl)-8-nitro-3,4-dihydropyrazino[1,2-b]indazole 6-oxide 7(1,4,4)**

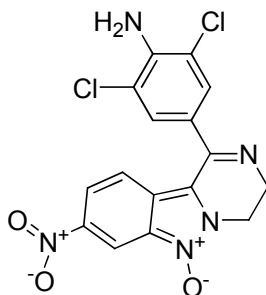

Yield 57.9 mg (67%). ESI-MS  $m/z$  = 392,  $[M+H]^+$ . HRMS (FAB)  $m/z$  calcd for  $C_{16}H_{12}Cl_2N_5O_3$   $[M + H]^+$  392.0317, found 392.0283

**4-Methyl-1-p-tolyl-3,4-dihydropyrazino[1,2-b]indazole 6-oxide 7(2,1,1)**

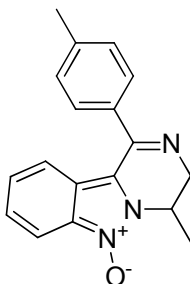

Yield (HPLC purified) 33.2 mg (78%). ESI-MS  $m/z$  = 292,  $[M+H]^+$ .  $^1H$  NMR (300 MHz,  $DMSO-d_6$ )  $\delta$ : 1.34 (d,  $J=6.63$  Hz, 3 H) 2.42 (s, 3 H) 3.96 (dd,  $J=16.57, 6.35$  Hz, 1 H) 4.36 (d,  $J=16.57$  Hz, 1 H) 5.09 - 5.20 (m, 1 H) 7.01 (d,  $J=8.84$  Hz, 1 H) 7.17 - 7.24 (m, 1 H) 7.30 - 7.38 (m, 3 H) 7.57 - 7.63 (m, 2 H) 7.74 (d,  $J=8.56$  Hz, 1 H).  $^{13}C$  NMR (75 MHz,  $DMSO-d_6$ )  $\delta$ : 16.28, 21.02, 44.26, 52.92, 108.8, 112.99, 114.90, 120.16, 125.99, 126.17, 128.36, 128.82, 128.97, 134.34, 140.06, 155.05. HRMS (FAB)  $m/z$  calcd for  $C_{18}H_{18}N_3O$   $[M + H]^+$  292.1450, found 292.1456

**1-p-Tolyl-3,4-dihydropyrazino[1,2-b]indazole 8(1,1,1)**

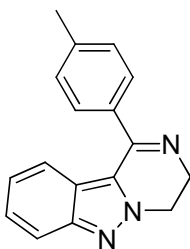

Yield 29.0 mg (54%). ESI-MS  $m/z = 262$ ,  $[M+H]^+$ .  $^1\text{H NMR}$  (300 MHz,  $\text{DMSO-}d_6$ )  $\delta$ : 2.47 (s, 3 H) 4.24 (t,  $J=6.91$  Hz, 2 H) 4.81 (t,  $J=6.77$  Hz, 2 H) 7.06 (d,  $J=8.56$  Hz, 1 H) 7.22 - 7.29 (m, 1 H) 7.38 - 7.51 (m, 3 H) 7.69 (d,  $J=8.01$  Hz, 2 H) 7.91 (d,  $J=8.56$  Hz, 1 H).  $^{13}\text{C NMR}$  (75 MHz,  $\text{DMSO-}d_6$ )  $\delta$ : 21.93, 45.75, 46.68, 119.44, 120.30, 121.05, 124.33, 126.30, 127.20, 129.90, 130.12, 131.05, 143.35, 148.36, 160.66. HRMS (FAB)  $m/z$  calcd for  $\text{C}_{17}\text{H}_{16}\text{N}_3$   $[M + H]^+$  262.1344, found 262.1342

#### 1-(4-Chlorophenyl)-3,4-dihydropyrazino[1,2-b]indazole 8(1,1,2)

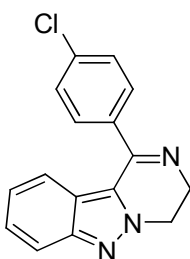

Yield 34.5 mg (60%). ESI-MS  $m/z = 282$ ,  $[M+H]^+$ .  $^1\text{H NMR}$  (300 MHz,  $\text{DMSO-}d_6$ )  $\delta$ : 4.18 (t,  $J=6.91$  Hz, 2 H) 4.62 - 4.70 (m, 2 H) 7.03 (d,  $J=8.56$  Hz, 1 H) 7.14 - 7.22 (m, 1 H) 7.32 - 7.40 (m, 1 H) 7.63 - 7.69 (m, 2 H) 7.72 - 7.78 (m, 2 H) 7.83 (d,  $J=8.84$  Hz, 1 H).  $^{13}\text{C NMR}$  (75 MHz,  $\text{DMSO-}d_6$ )  $\delta$ : 46.21, 47.90, 118.91, 119.13, 120.45, 124.34, 125.09, 126.71, 129.43, 131.07, 135.52, 136.41, 147.99, 158.29. HRMS (FAB)  $m/z$  calcd for  $\text{C}_{16}\text{H}_{13}\text{N}_3\text{Cl}$   $[M + H]^+$  282.0798, found 282.0776

#### 1-(4-Methoxyphenyl)-3,4-dihydropyrazino[1,2-b]indazole 8(1,1,3)

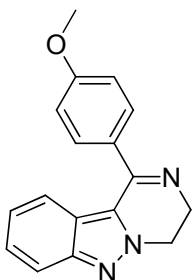

Yield 19.5 mg (34%). ESI-MS  $m/z = 278$ ,  $[M+H]^+$ .  $^1H$  NMR (300 MHz, DMSO- $d_6$ )  $\delta$ : 3.88 (s, 3 H) 4.17 (t,  $J=6.91$  Hz, 2 H) 4.77 (t,  $J=6.77$  Hz, 2 H) 7.13 (d,  $J=8.56$  Hz, 1 H) 7.18 (d,  $J=8.84$  Hz, 2 H) 7.22 - 7.28 (m, 1 H) 7.38 - 7.44 (m, 1 H) 7.74 (d,  $J=8.84$  Hz, 2 H) 7.89 (d,  $J=8.56$  Hz, 1 H).  $^{13}C$  NMR (75 MHz, DMSO- $d_6$ )  $\delta$ : 45.64, 46.74, 56.34, 114.98, 119.37, 120.41, 120.94, 124.31, 126.17, 127.13, 131.02, 131.91, 148.29, 159.99, 163.30. HRMS (FAB)  $m/z$  calcd for  $C_{17}H_{16}N_3O$   $[M + H]^+$  278.1293, found 278.1288

#### 2,6-Dichloro-4-(3,4-dihydropyrazino[1,2-b]indazol-1-yl)aniline 8(1,1,4)

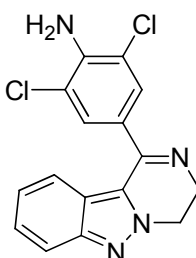

Yield 67.6 mg (99%). ESI-MS  $m/z = 331$ ,  $[M+H]^+$ .  $^1H$  NMR (300 MHz, DMSO- $d_6$ )  $\delta$ : 4.12 (t,  $J=6.63$  Hz, 2 H) 4.70 (t,  $J=6.63$  Hz, 2 H) 6.42 (br. s., 2 H) 7.26 (d,  $J=3.59$  Hz, 2 H) 7.39 (ddd,  $J=8.42, 4.14, 4.01$  Hz, 1 H) 7.65 (s, 2 H) 7.87 (d,  $J=8.56$  Hz, 1 H).  $^{13}C$  NMR (75 MHz, DMSO- $d_6$ )  $\delta$ : 46.10, 46.68, 118.29, 119.30, 120.24, 122.38, 124.02, 125.88, 126.96, 129.73, 145.24, 148.18, 157.57. HRMS (FAB)  $m/z$  calcd for  $C_{16}H_{13}N_4Cl_2$   $[M + H]^+$  331.0517, found 331.0517

#### 8-Methoxy-1-p-tolyl-3,4-dihydropyrazino[1,2-b]indazole 8(1,2,1)

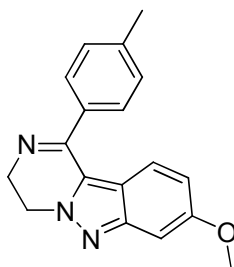

Yield (HPLC purified) 12.2 mg (21%). ESI-MS  $m/z = 292$ ,  $[M+H]^+$ .  $^1\text{H NMR}$  (300 MHz,  $\text{DMSO-}d_6$ )  $\delta$ : 2.41 (s, 3 H) 3.80 (s, 3 H) 4.10 (t,  $J=6.91$  Hz, 2 H) 4.51 (t,  $J=6.91$  Hz, 2 H) 6.75 - 6.81 (m, 1 H) 6.87 - 6.93 (m, 1 H) 7.11 (d,  $J=1.93$  Hz, 1 H) 7.34 (d,  $J=8.01$  Hz, 2 H) 7.58 (d,  $J=8.01$  Hz, 2 H).  $^{13}\text{C NMR}$  (75 MHz,  $\text{DMSO-}d_6$ )  $\delta$ : 21.74, 45.75, 48.58, 55.95, 96.39, 113.93, 118.41, 121.52, 124.68, 128.89, 129.66, 135.12, 140.78, 148.94, 158.40, 158.64. HRMS (FAB)  $m/z$  calcd for  $\text{C}_{18}\text{H}_{18}\text{N}_3\text{O}$   $[M + H]^+$  292.1450, found 292.1465

**1-(4-Chlorophenyl)-8-methoxy-3,4-dihydropyrazino[1,2-b]indazole 8(1,2,2)**

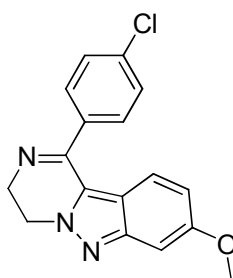

Yield (HPLC purified) 53.9 mg (86%). ESI-MS  $m/z = 312$ ,  $[M+H]^+$ . HRMS (FAB)  $m/z$  calcd for  $\text{C}_{17}\text{H}_{15}\text{ClN}_3\text{O}$   $[M + H]^+$  312.0904, found 312.0911

**8-Methoxy-1-(4-methoxyphenyl)-3,4-dihydropyrazino[1,2-b]indazole 8(1,2,3)**

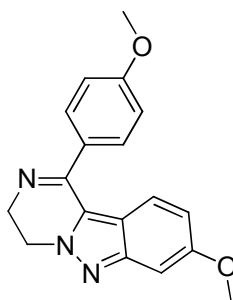

Yield (HPLC purified) 22.6 mg (36%). ESI-MS  $m/z = 308$ ,  $[M+H]^+$ . HRMS (FAB)  $m/z$  calcd for  $\text{C}_{18}\text{H}_{18}\text{N}_3\text{O}_2$   $[M + H]^+$  308.1399, found 308.1392

**2,6-Dichloro-4-(8-methoxy-3,4-dihydropyrazino[1,2-b]indazol-1-yl)aniline 8(1,2,4)**

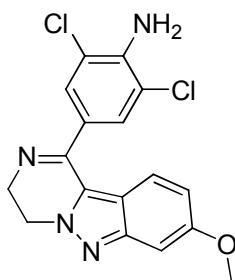

Yield (HPLC purified) 13.6 mg (19%). ESI-MS  $m/z = 361$ ,  $[M+H]^+$ . HRMS (FAB)  $m/z$  calcd for  $C_{17}H_{15}Cl_2N_4O$   $[M + H]^+$  361.0623, found 361.0618

**1-p-Tolyl-8-(trifluoromethyl)-3,4-dihydropyrazino[1,2-b]indazole 8(1,3,1)**

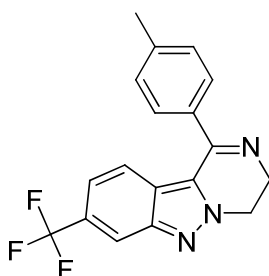

Yield 8.3 mg (12%). ESI-MS  $m/z = 330$ ,  $[M+H]^+$ . HRMS (FAB)  $m/z$  calcd for  $C_{18}H_{15}F_3N_3$   $[M + H]^+$  330.1218, found 330.1219

**1-(4-Chlorophenyl)-8-(trifluoromethyl)-3,4-dihydropyrazino[1,2-b]indazole 8(1,3,2)**

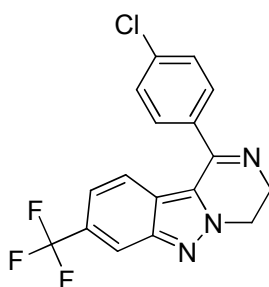

Yield 44.5 mg (61%). ESI-MS  $m/z = 350$ ,  $[M+H]^+$ . HRMS (FAB)  $m/z$  calcd for  $C_{17}H_{12}F_3N_3Cl$   $[M + H]^+$  350.0672, found 350.0685

**1-(4-Methoxyphenyl)-8-(trifluoromethyl)-3,4-dihydropyrazino[1,2-b]indazole 8(1,3,3)**

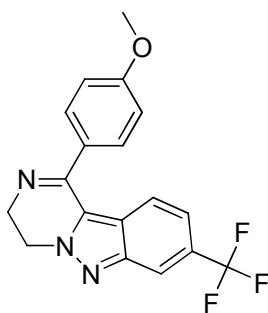

Yield 46.1 mg (64%). ESI-MS  $m/z = 346$ ,  $[M+H]^+$ .  $^1H$  NMR (300 MHz, DMSO- $d_6$ )  $\delta$ : 3.88 (s, 3 H) 4.18 (t,  $J=6.77$  Hz, 2 H) 4.75 (t,  $J=6.91$  Hz, 2 H) 7.12 - 7.18 (m, 2 H) 7.30 - 7.35 (m, 1 H) 7.41 - 7.47 (m, 1 H) 7.69 - 7.76 (m, 2 H) 8.31 (s, 1 H).  $^{13}C$  NMR (75 MHz, DMSO- $d_6$ )  $\delta$ : 46.72, 47.03, 56.20, 114.80, 117.36 (q,  $J=4.2$  Hz), 120.40 (d,  $J=3.2$  Hz), 120.88, 122.69, 125.07 (q,  $J=272.7$  Hz), 125.27, 127.30 (q,  $J=31.3$  Hz), 127.96, 131.24, 146.45, 158.68, 162.61. HRMS (FAB)  $m/z$  calcd for  $C_{18}H_{15}N_3OF_3$   $[M + H]^+$  346.1167, found 346.1178

**2,6-Dichloro-4-(8-(trifluoromethyl)-3,4-dihydropyrazino[1,2-b]indazol-1-yl)aniline**  
**8(1,3,4)**

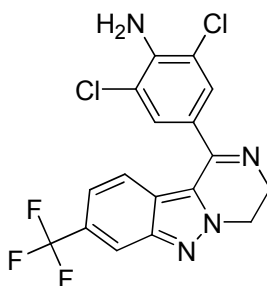

Yield 81.7 mg (98%). ESI-MS  $m/z = 399$ ,  $[M+H]^+$ . HRMS (FAB)  $m/z$  calcd for  $C_{17}H_{12}F_3N_4Cl_2$   $[M + H]^+$  399.0391, found 399.0398

**8-Nitro-1-p-tolyl-3,4-dihydropyrazino[1,2-b]indazole 8(1,4,1)**

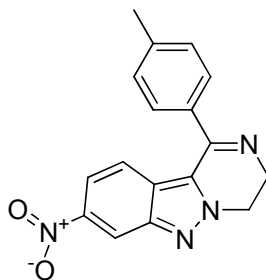

Yield 37.8 mg (56%). ESI-MS  $m/z = 307$ ,  $[M+H]^+$ .  $^1H$  NMR (300 MHz, DMSO- $d_6$ )  $\delta$ : 2.45 (s, 3 H) 4.22 (t,  $J=6.91$  Hz, 2 H) 4.78 (t,  $J=6.91$  Hz, 2 H) 7.25 (d,  $J=9.12$  Hz, 1 H) 7.42 (d,  $J=7.73$  Hz, 2 H) 7.65 (d,  $J=8.29$  Hz, 2 H) 7.95 (dd,  $J=9.25, 2.07$  Hz, 1 H) 8.84 (d,  $J=1.93$  Hz, 1 H).  $^{13}C$  NMR (75 MHz, DMSO- $d_6$ )  $\delta$ : 21.85, 34.30, 46.86, 47.49, 116.41, 116.88, 118.47, 121.71, 122.46, 125.69, 129.25, 130.01, 142.04, 146.09, 146.60. HRMS (FAB)  $m/z$  calcd for  $C_{17}H_{15}N_4O_2$   $[M + H]^+$  307.1195, found 307.1202

**1-(4-Chlorophenyl)-8-nitro-3,4-dihydropyrazino[1,2-b]indazole 8(1,4,2)**

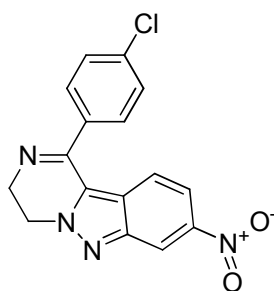

Yield 4.0 mg (7%). ESI-MS  $m/z = 327$ ,  $[M+H]^+$ . HRMS (FAB)  $m/z$  calcd for  $C_{16}H_{12}N_4O_2Cl$   $[M + H]^+$  327.0649, found 327.0640

**1-(4-Methoxyphenyl)-8-nitro-3,4-dihydropyrazino[1,2-b]indazole 8(1,4,3)**

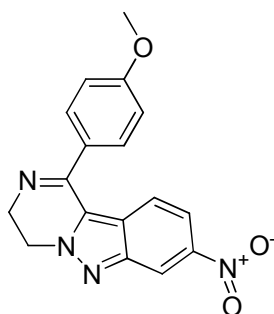

Yield 40.0 mg (56%). ESI-MS  $m/z = 323$ ,  $[M+H]^+$ . HRMS (FAB)  $m/z$  calcd for  $C_{17}H_{15}N_4O_3$   $[M + H]^+$  323.1144, found 323.1136

**2,6-Dichloro-4-(8-nitro-3,4-dihydropyrazino[1,2-b]indazol-1-yl)aniline 8(1,4,4)**

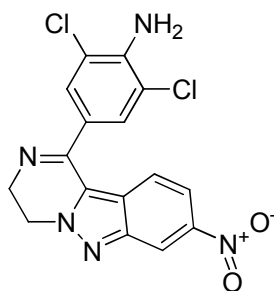

Yield 10.5 mg (12%). ESI-MS  $m/z = 376$ ,  $[M+H]^+$ . HRMS (FAB)  $m/z$  calcd for  $C_{16}H_{12}Cl_2N_5O_2$   
 $[M + H]^+$  376.0368, found 376.0358

### 3,4-Dihydropyrazino[1,2-b]indazol-1(2H)-one 10(1,1,5)

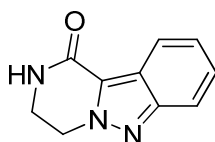

Yield (HPLC purified) 5.8 mg (33%). ESI-MS  $m/z = 188$ ,  $[M+H]^+$ .  $^1H$  NMR (300 MHz, DMSO- $d_6$ )  $\delta$ : 3.69 - 3.78 (m, 2 H) 4.61 - 4.67 (m, 2 H) 7.22 - 7.30 (m, 1 H) 7.36 (ddd,  $J=8.42, 6.91, 1.24$  Hz, 1 H) 7.75 (d,  $J=8.84$  Hz, 1 H) 7.98 (d,  $J=8.29$  Hz, 1 H) 8.29 (br. s., 1 H).  $^{13}C$  NMR (75 MHz, DMSO- $d_6$ )  $\delta$ : 39.61, 48.30, 118.44, 121.20, 121.53, 124.69, 126.02, 126.82, 147.97, 159.84. HRMS (FAB)  $m/z$  calcd for  $C_{10}H_{10}N_3O$   $[M + H]^+$  188.0824, found 188.0809

### 2,3,4,5-Tetrahydro-1H-[1,4]diazepino[1,2-b]indazol-1-one 11

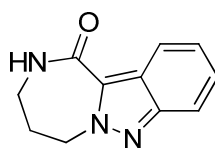

Yield (HPLC purified) 2.4 mg (10%). ESI-MS  $m/z = 202$ ,  $[M+H]^+$ . HRMS (FAB)  $m/z$  calcd for  $C_{11}H_{12}N_3O$   $[M + H]^+$  202.0980, found 202.0976



$^1\text{H}$  and  $^{13}\text{C}$  NMR spectra ( $d_6$ -DMSO) for compound 7(1,1,1)

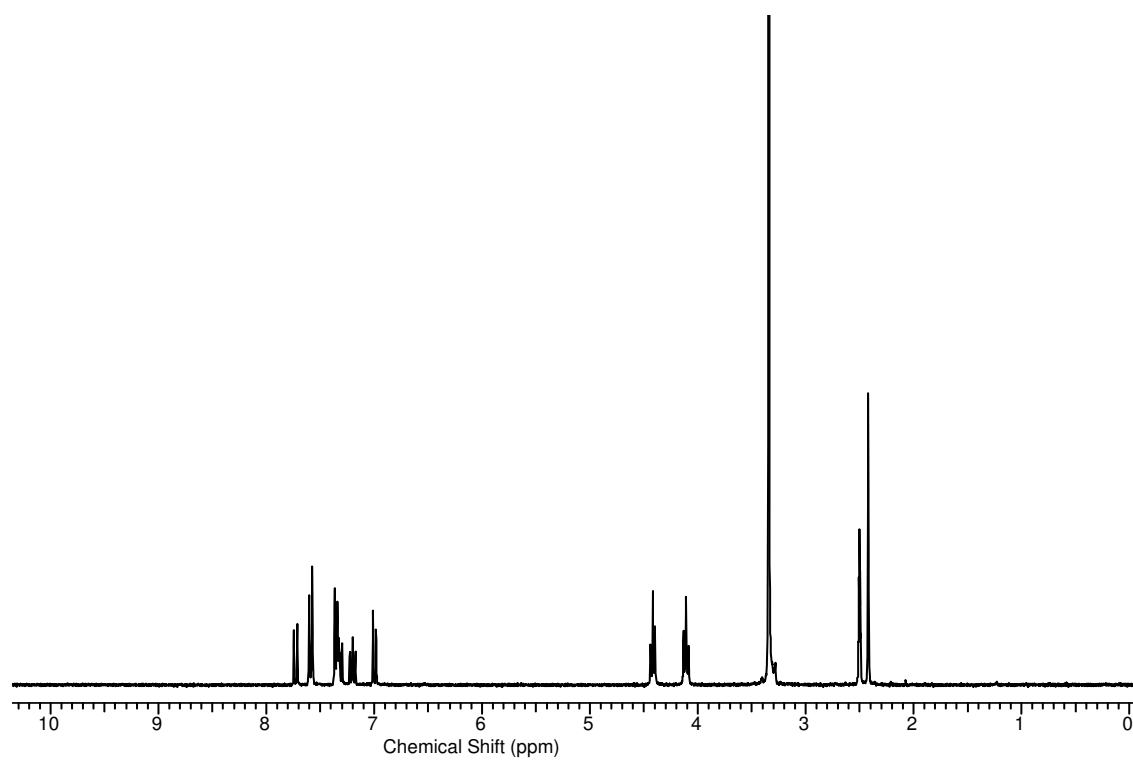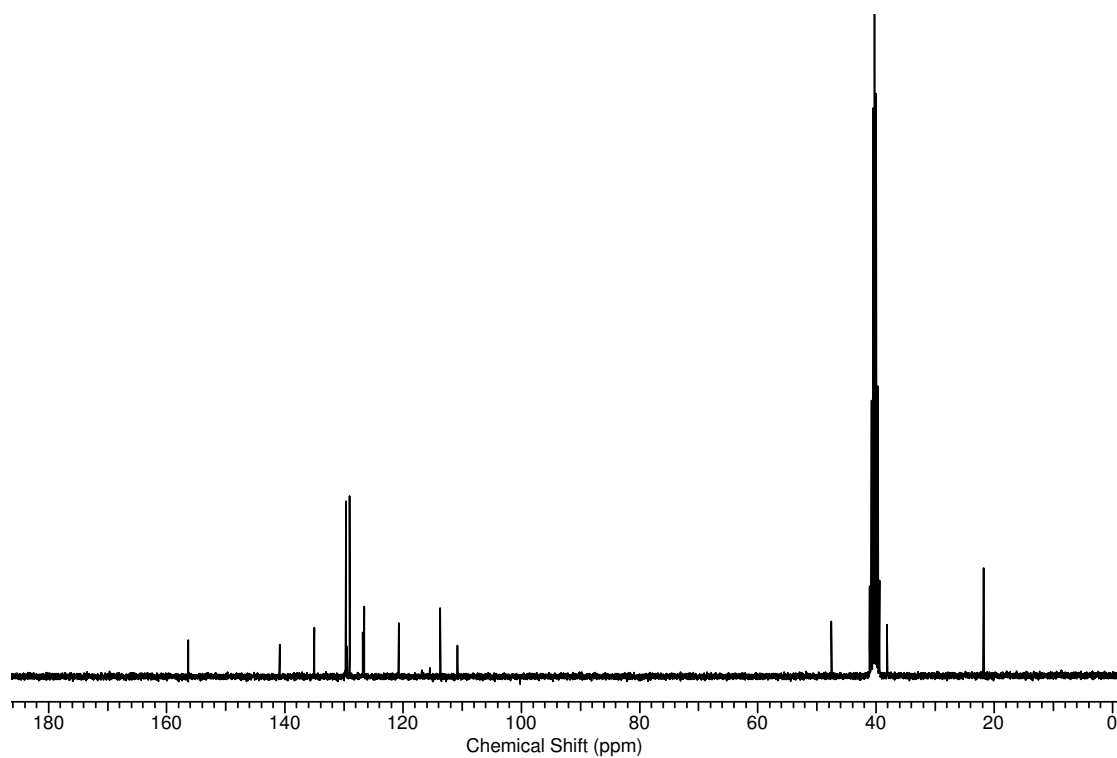

$^1\text{H}$  and  $^{13}\text{C}$  NMR spectra ( $d_6$ -DMSO) for compound 7(1,1,2)

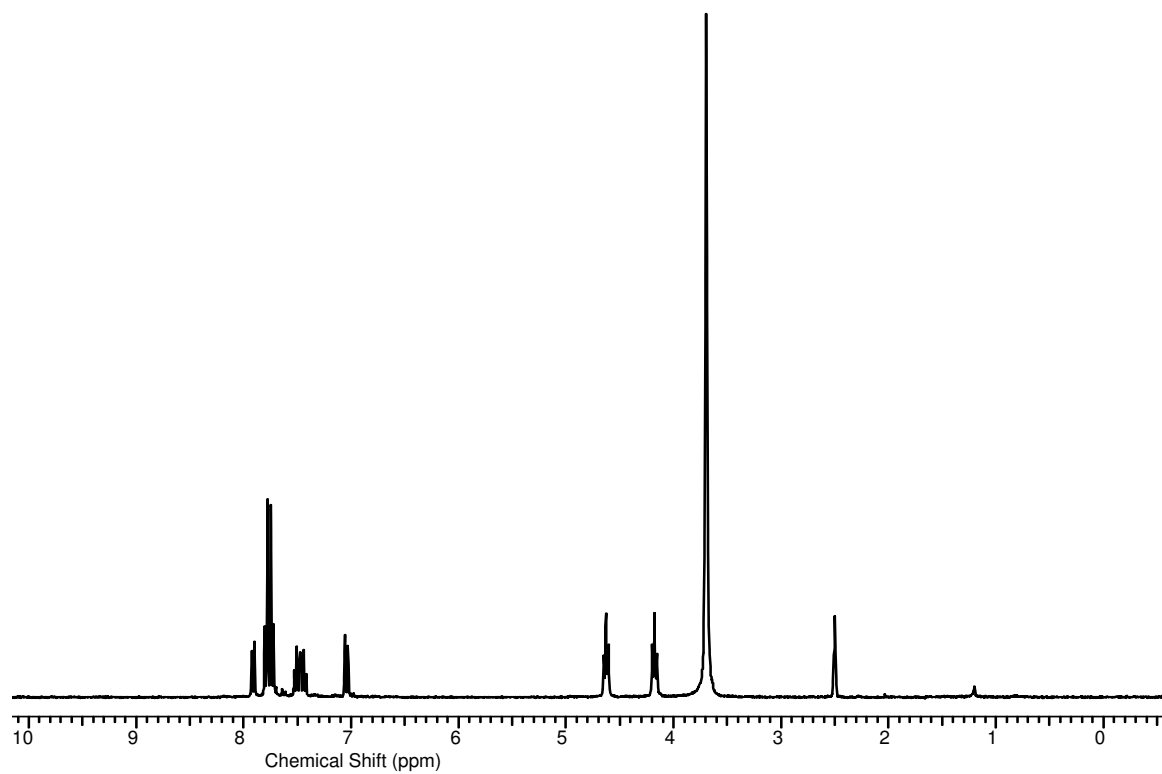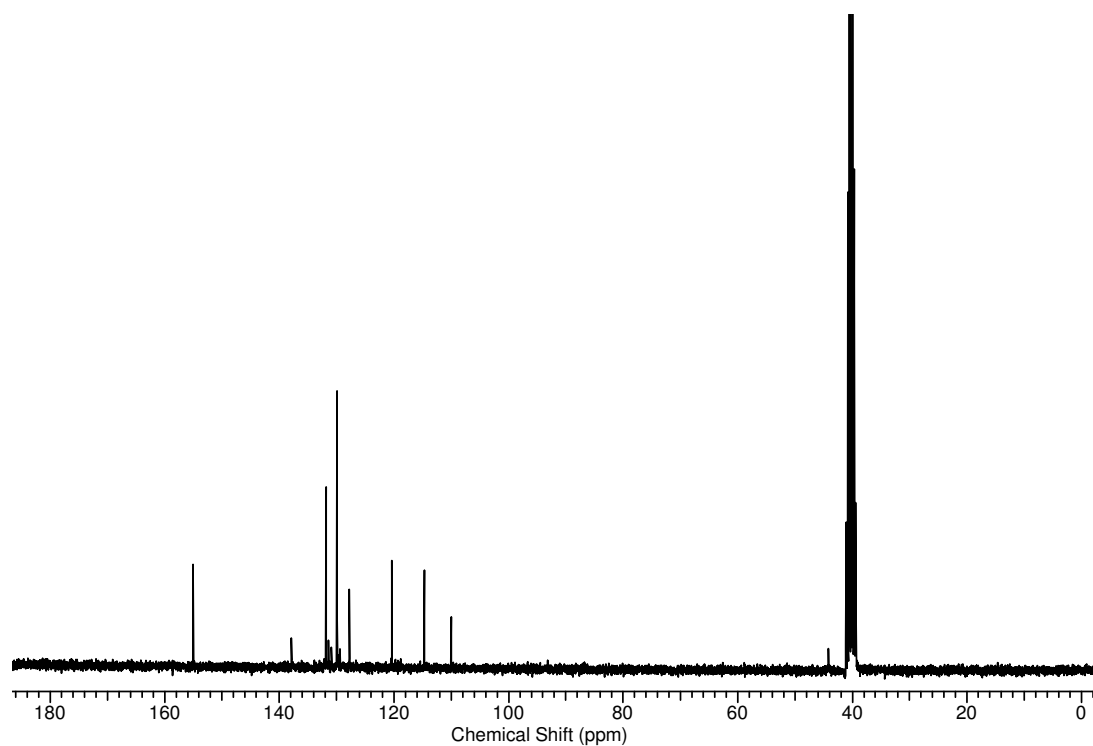

**$^1\text{H}$  and  $^{13}\text{C}$  NMR spectra ( $\text{d}_6\text{-DMSO}$ ) for compound 7(1,1,3)**

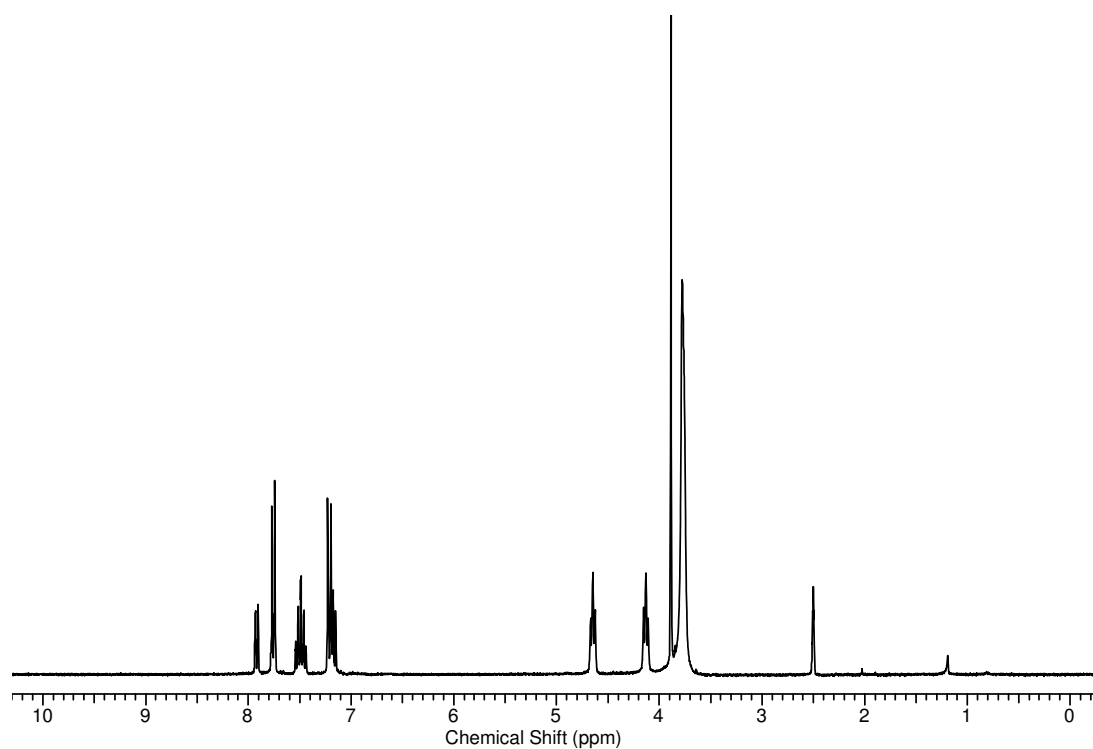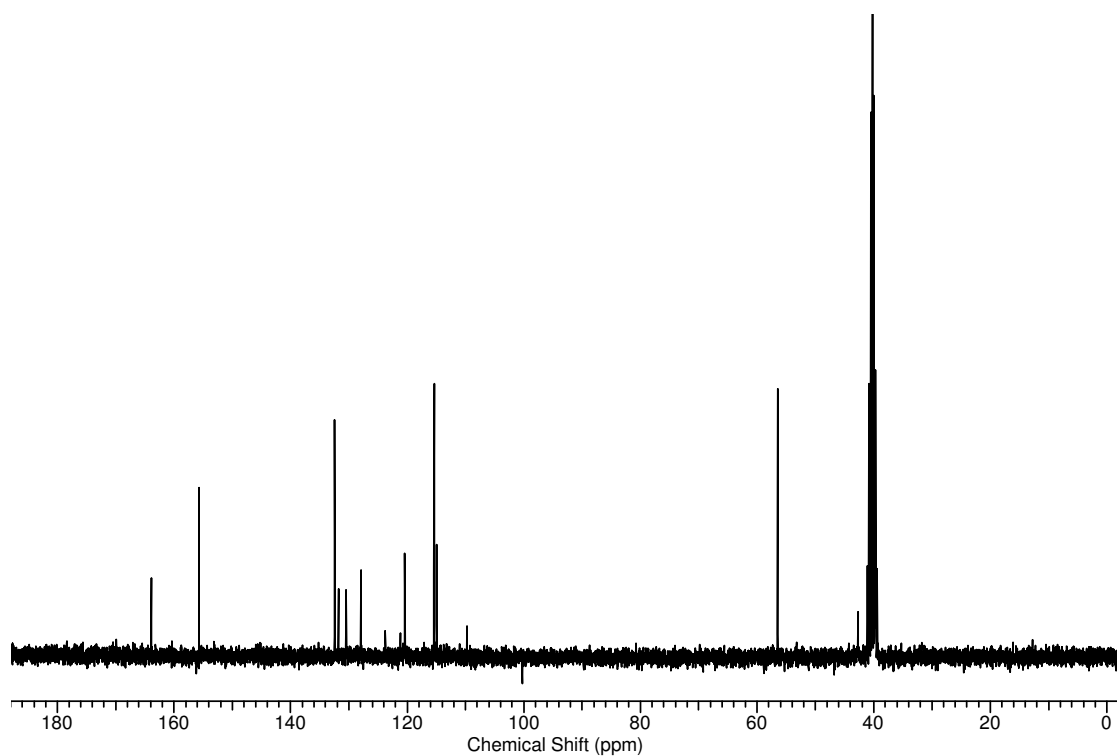

$^1\text{H}$  and  $^{13}\text{C}$  NMR spectra ( $\text{d}_6\text{-DMSO}$ ) for compound 7(1,1,4)

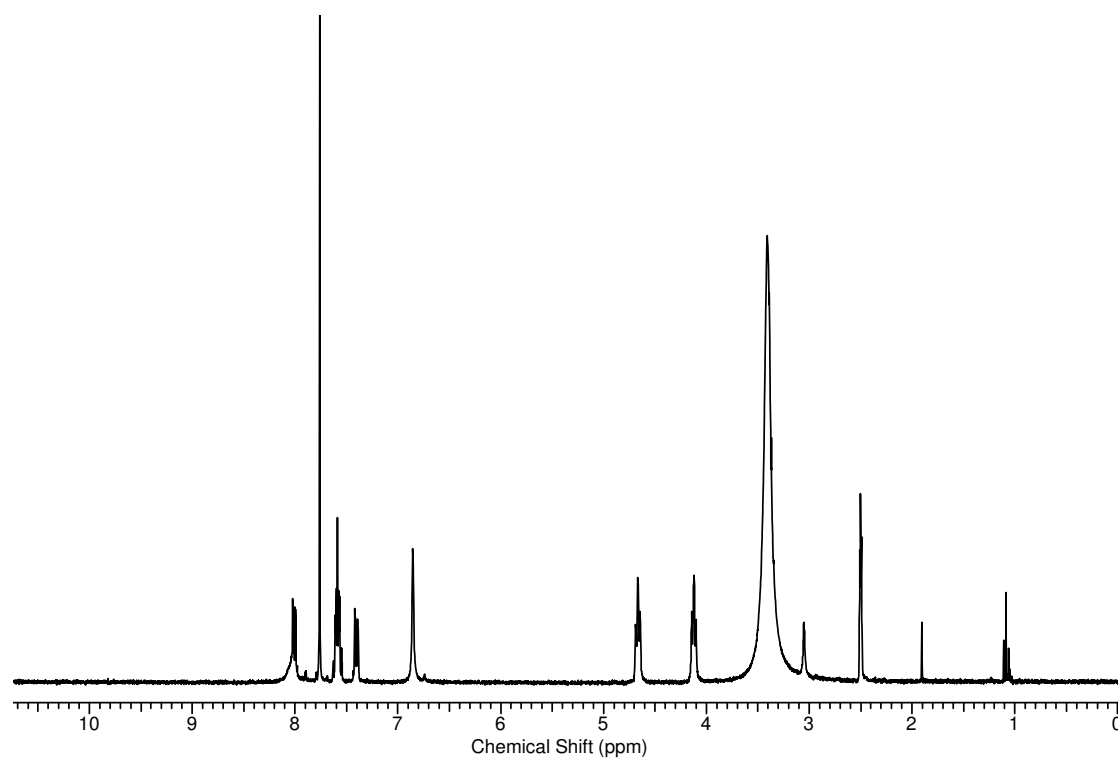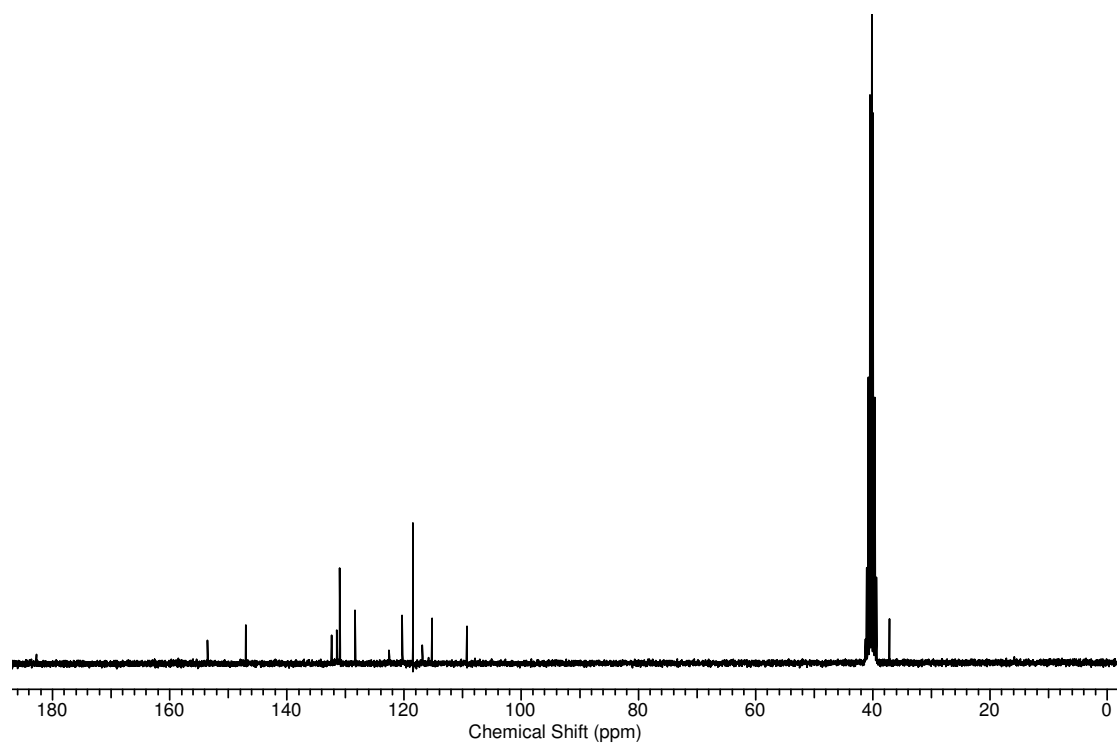

**$^1\text{H}$  and  $^{13}\text{C}$  NMR spectra ( $\text{d}_6\text{-DMSO}$ ) for compound 7(1,2,3)**

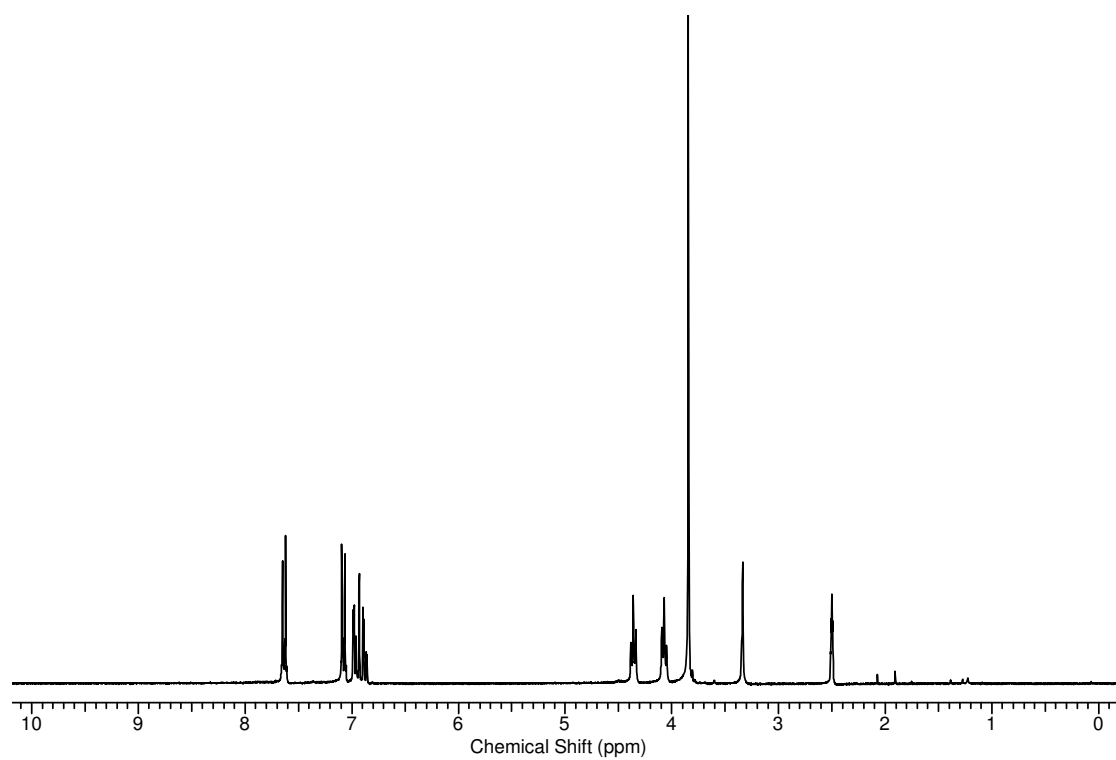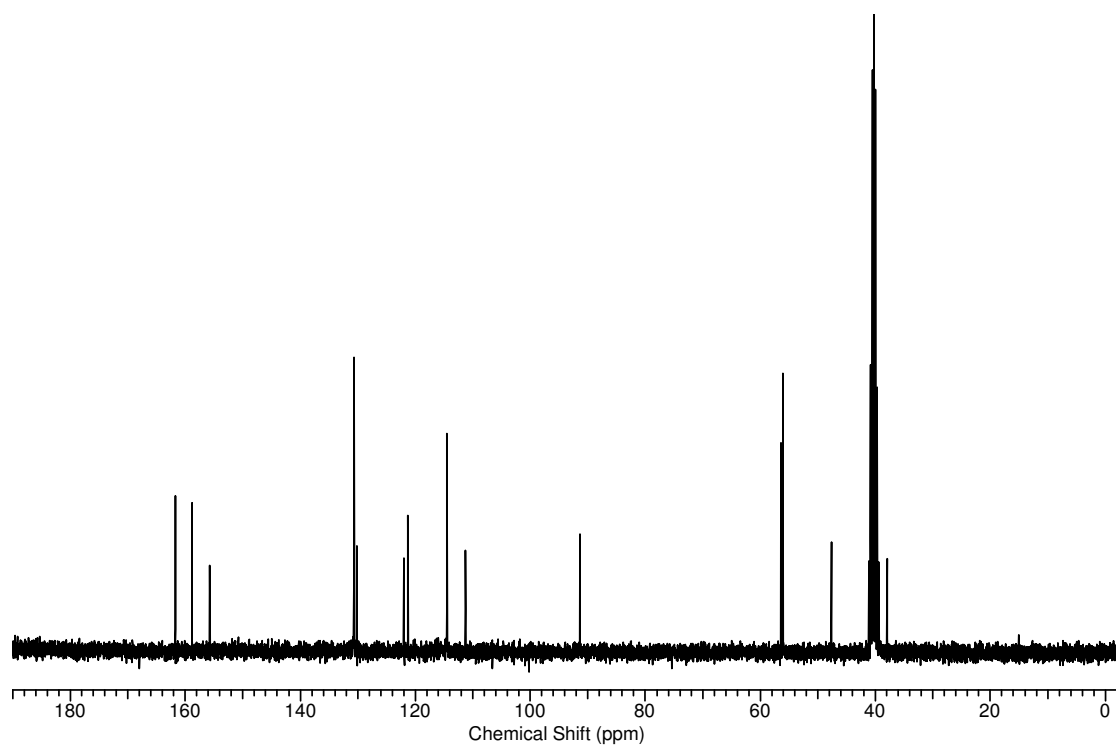

$^1\text{H}$  and  $^{13}\text{C}$  NMR spectra ( $\text{d}_6\text{-DMSO}$ ) for compound 7(1,3,1)

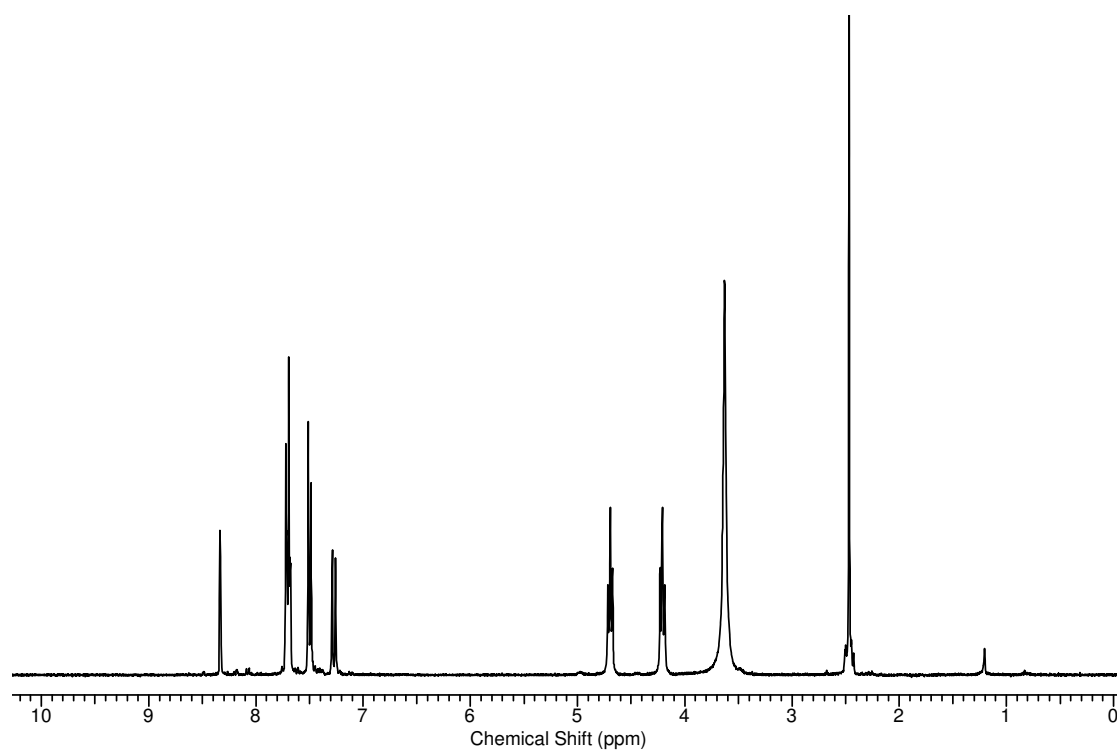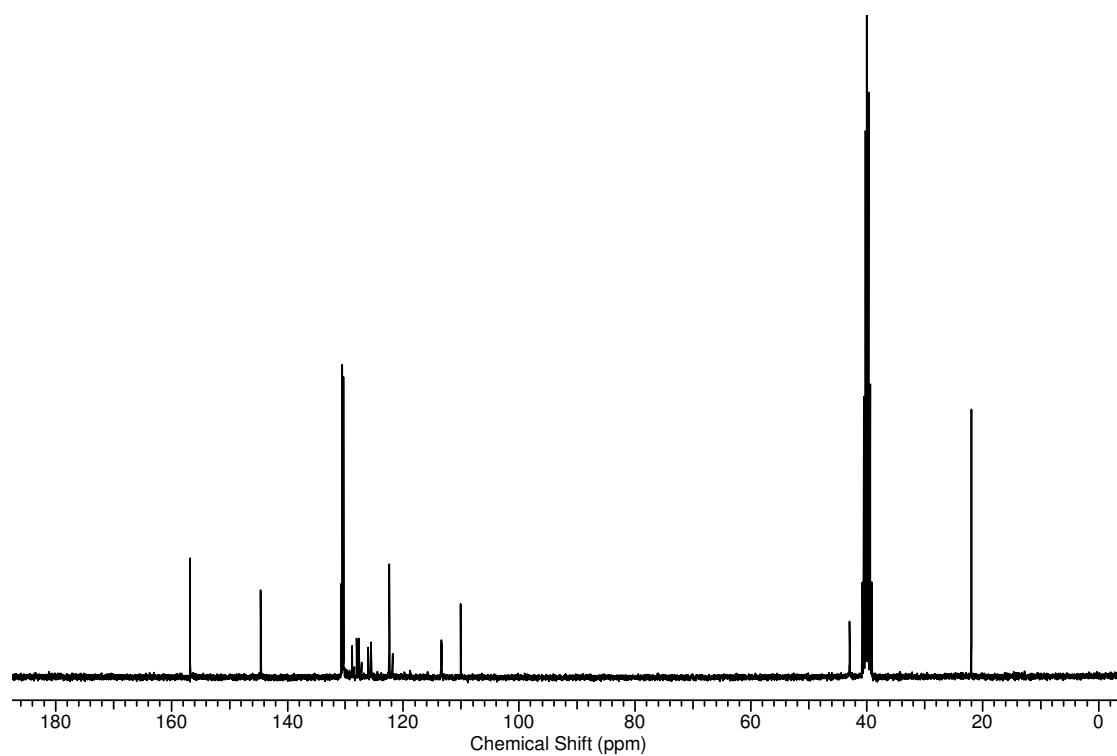

**$^1\text{H}$  and  $^{13}\text{C}$  NMR spectra ( $\text{d}_6\text{-DMSO}$ ) for compound 7(1,4,3)**

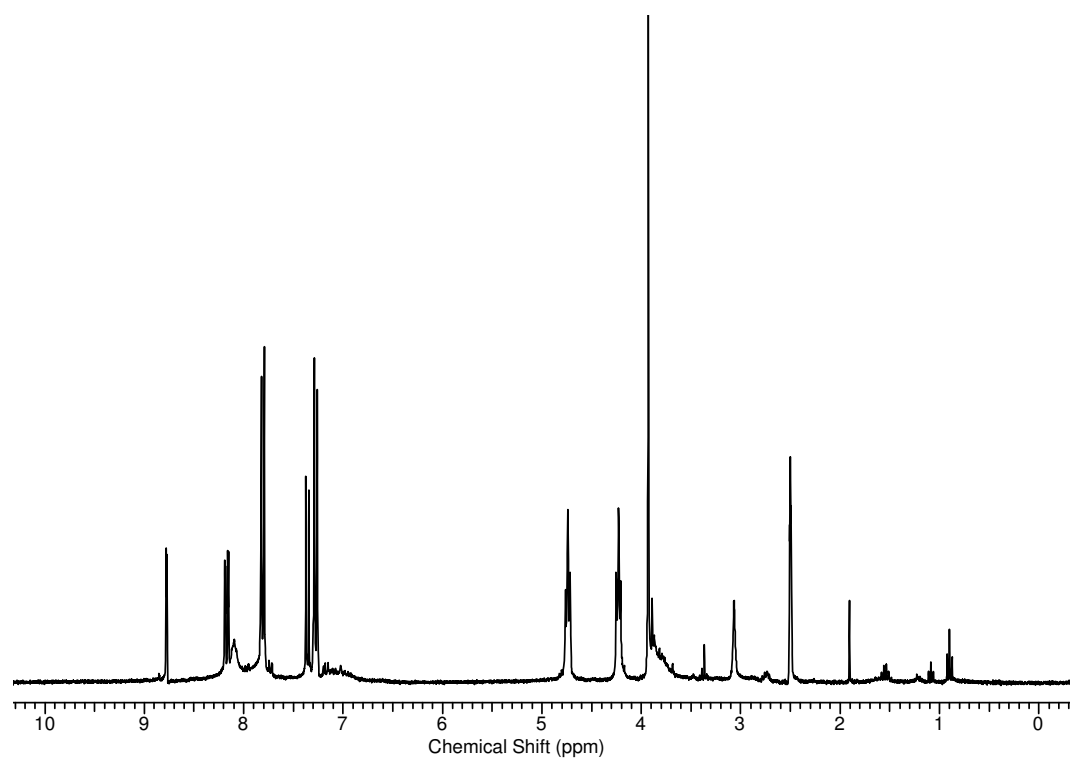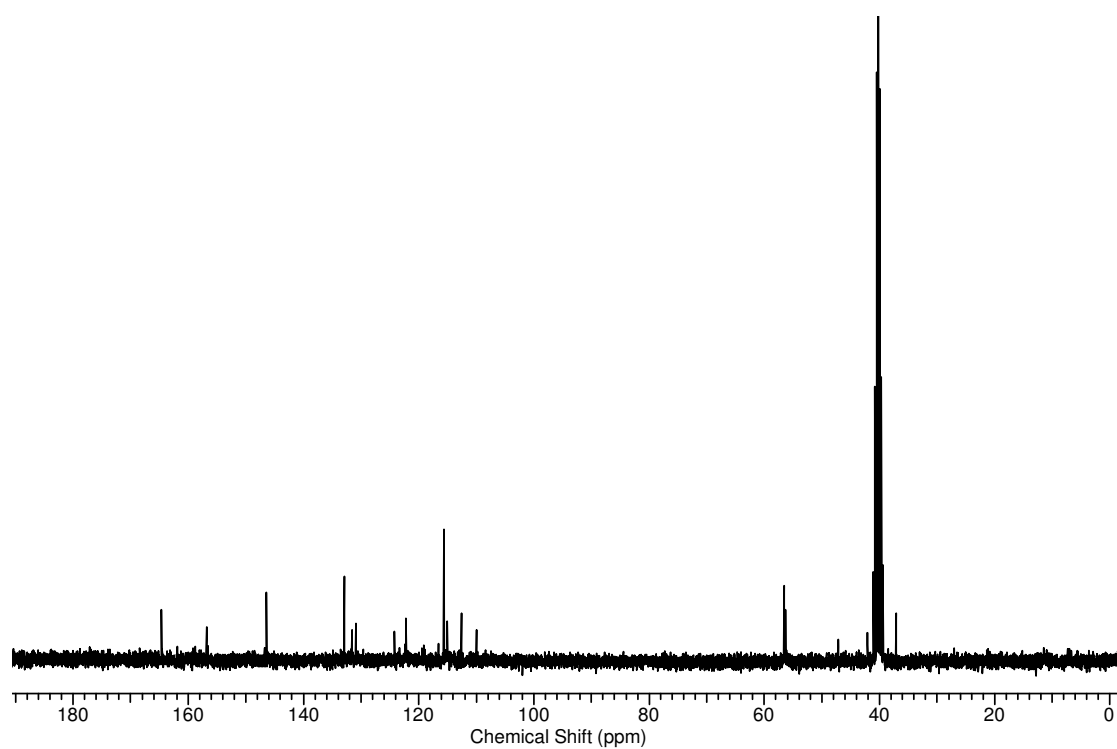

$^1\text{H}$  and  $^{13}\text{C}$  NMR spectra ( $\text{d}_6\text{-DMSO}$ ) for compound 7(2,1,1)

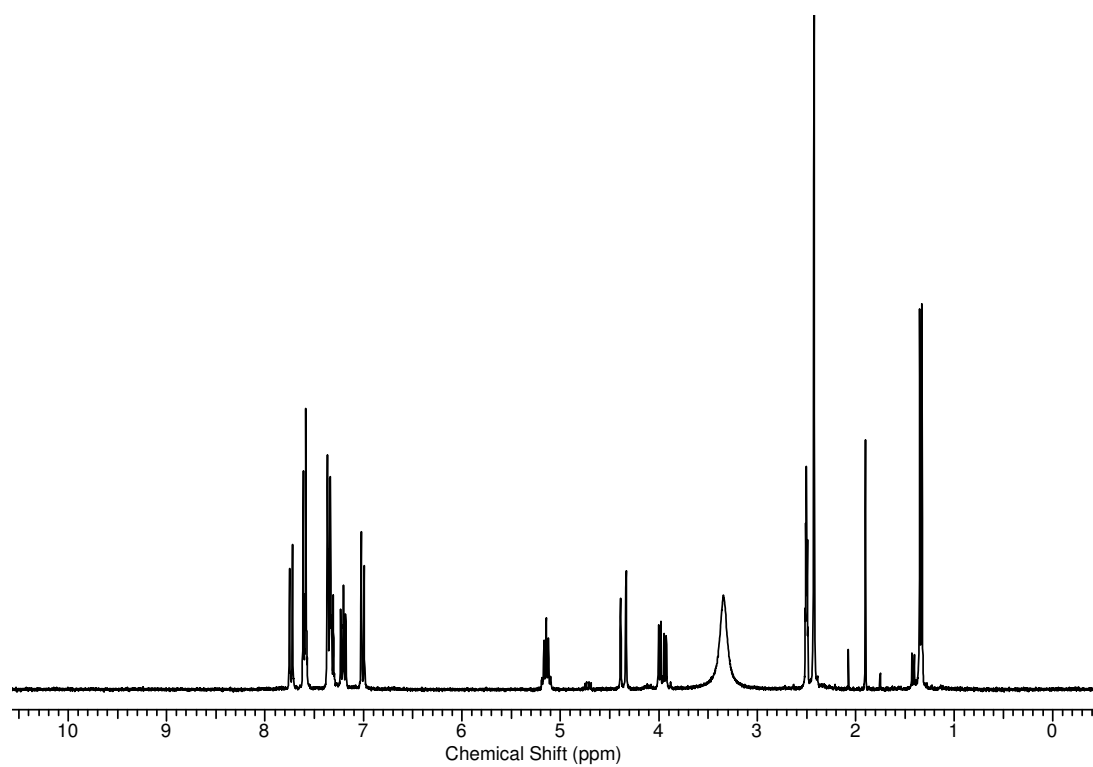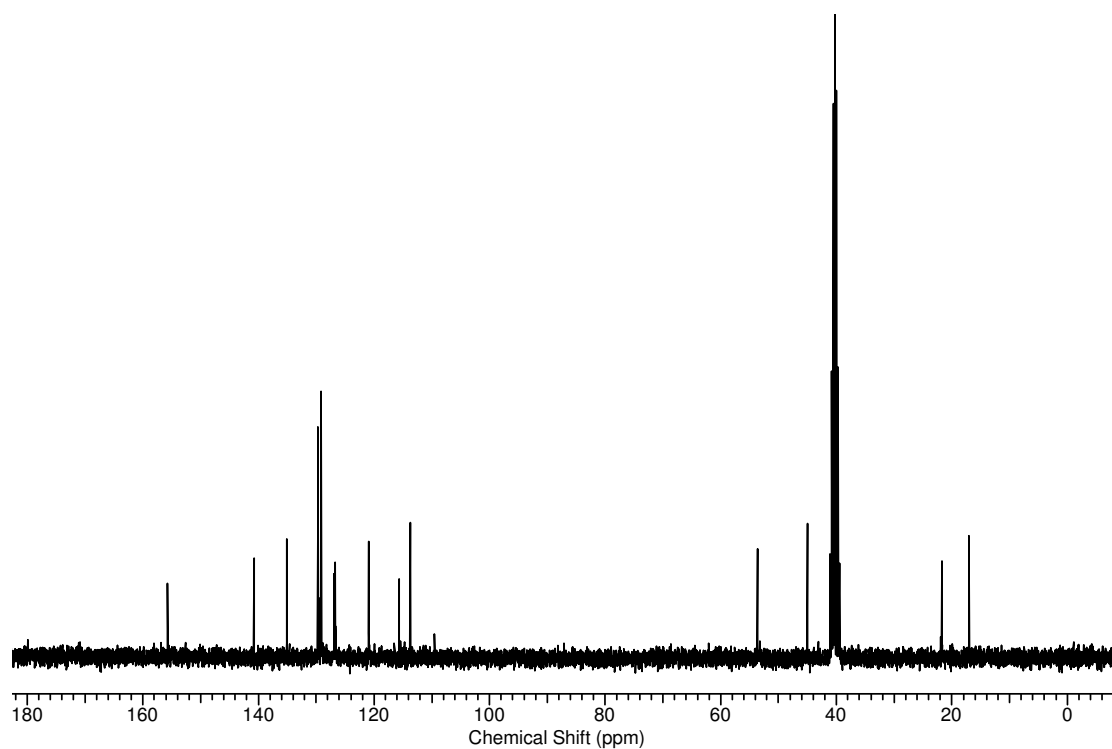



COSY and HETCOR NMR spectra ( $d_6$ -DMSO) for compound 7(2,1,1)

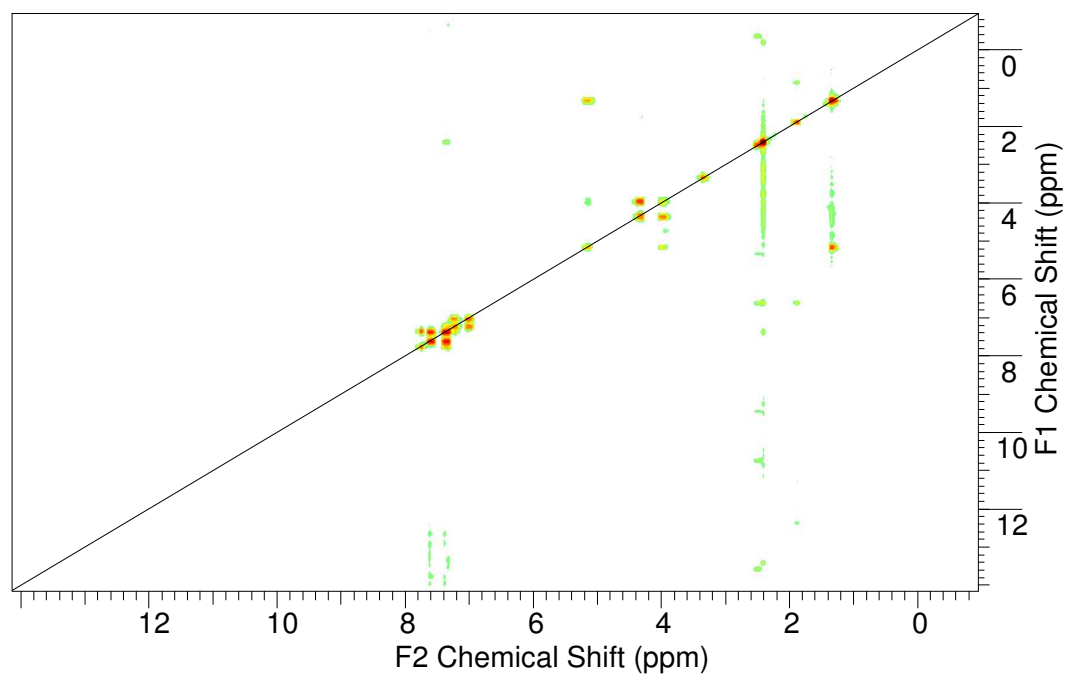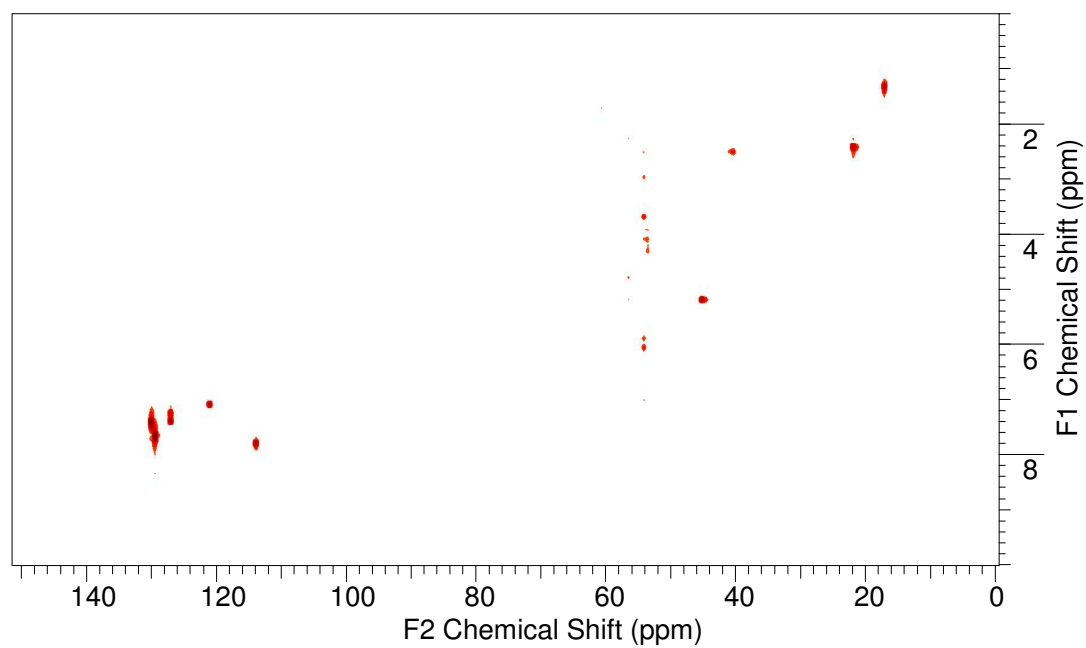

### Chemical shifts and gHMBC NMR spectrum (d<sub>6</sub>-DMSO) for compound 7(2,1,1)

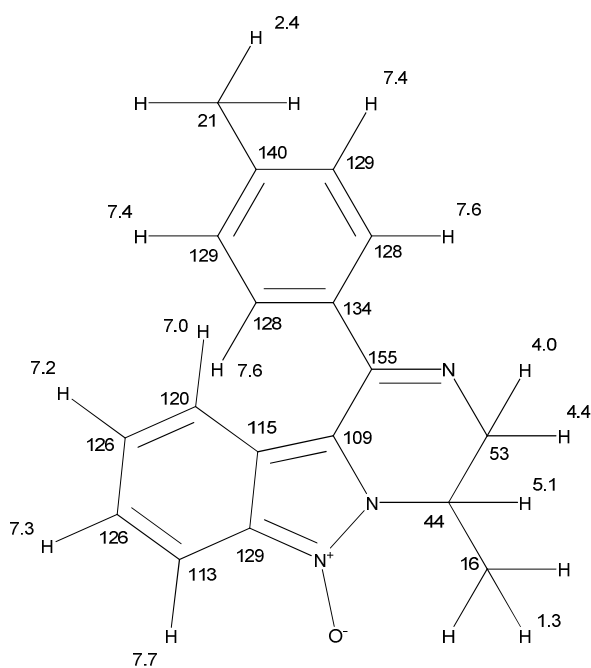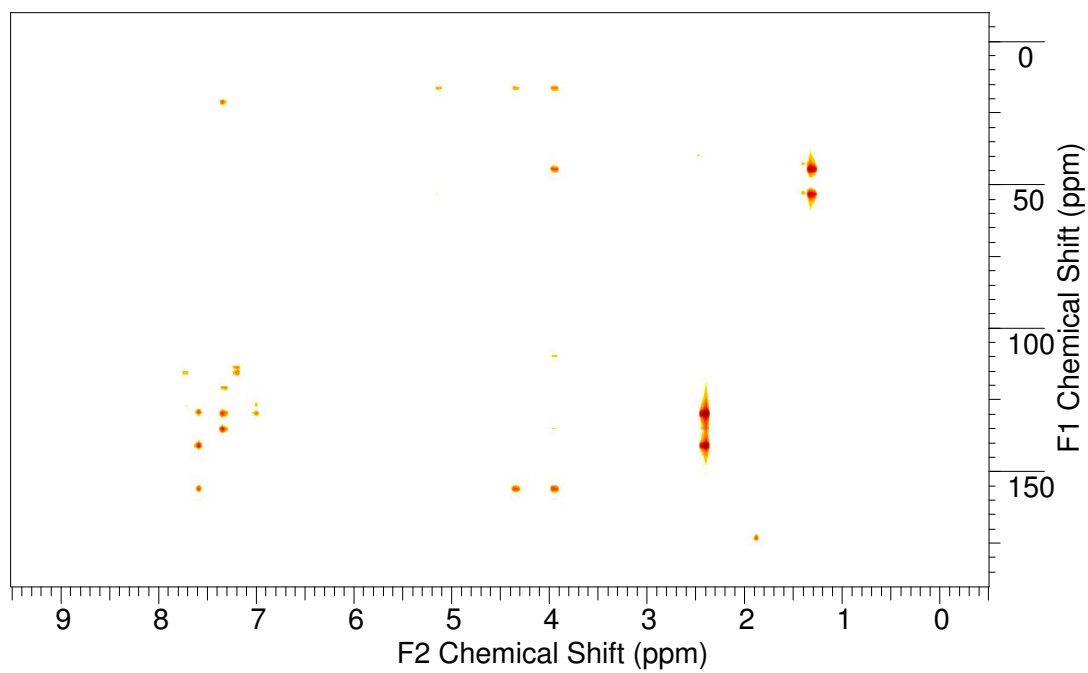

$^1\text{H}$  and  $^{13}\text{C}$  NMR spectra ( $\text{d}_6\text{-DMSO}$ ) for compound 8(1,1,1)

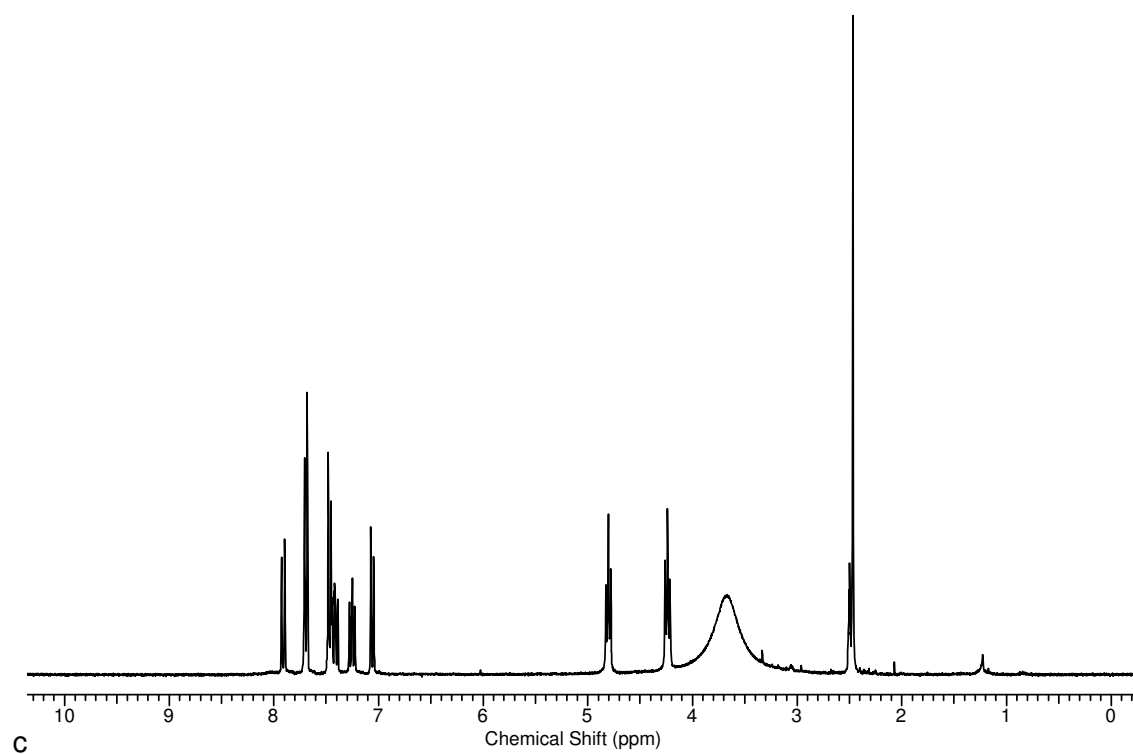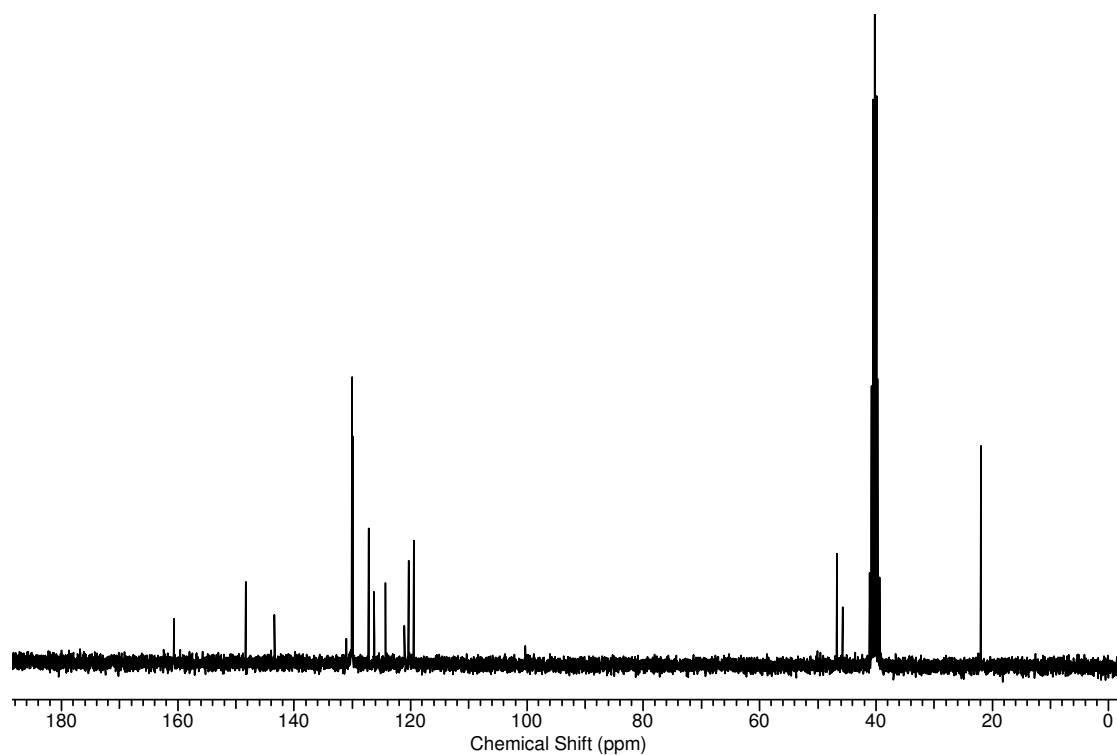

**$^1\text{H}$  and  $^{13}\text{C}$  NMR spectra ( $\text{d}_6\text{-DMSO}$ ) for compound 8(1,1,2)**

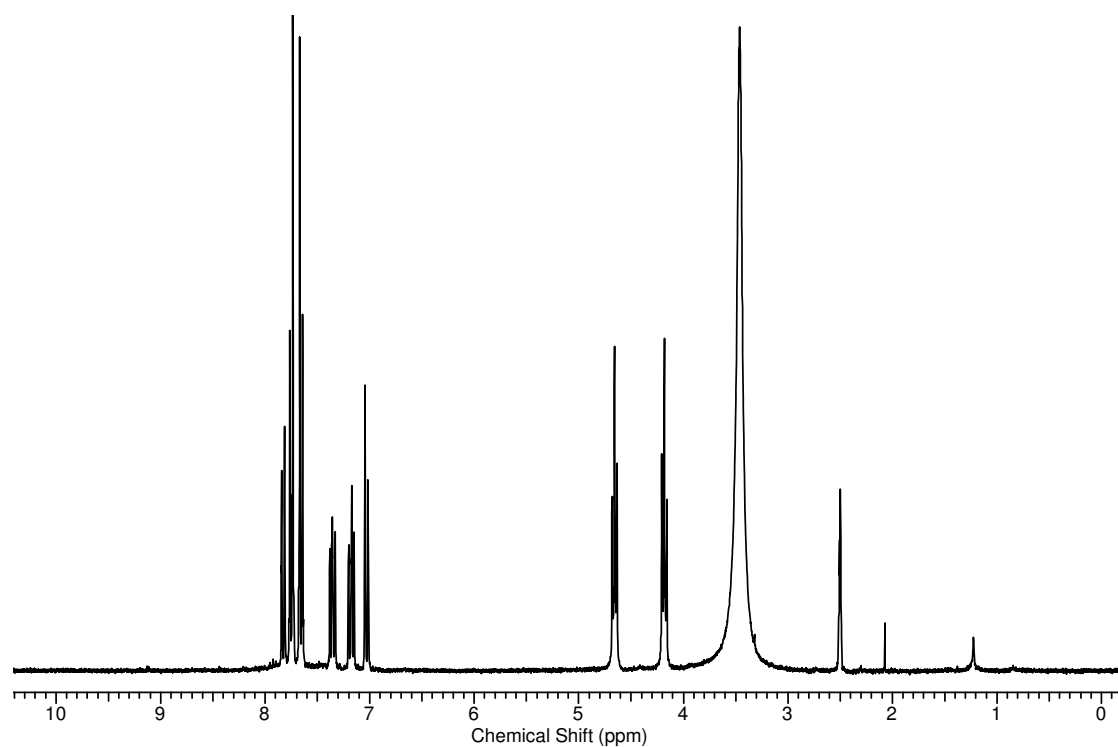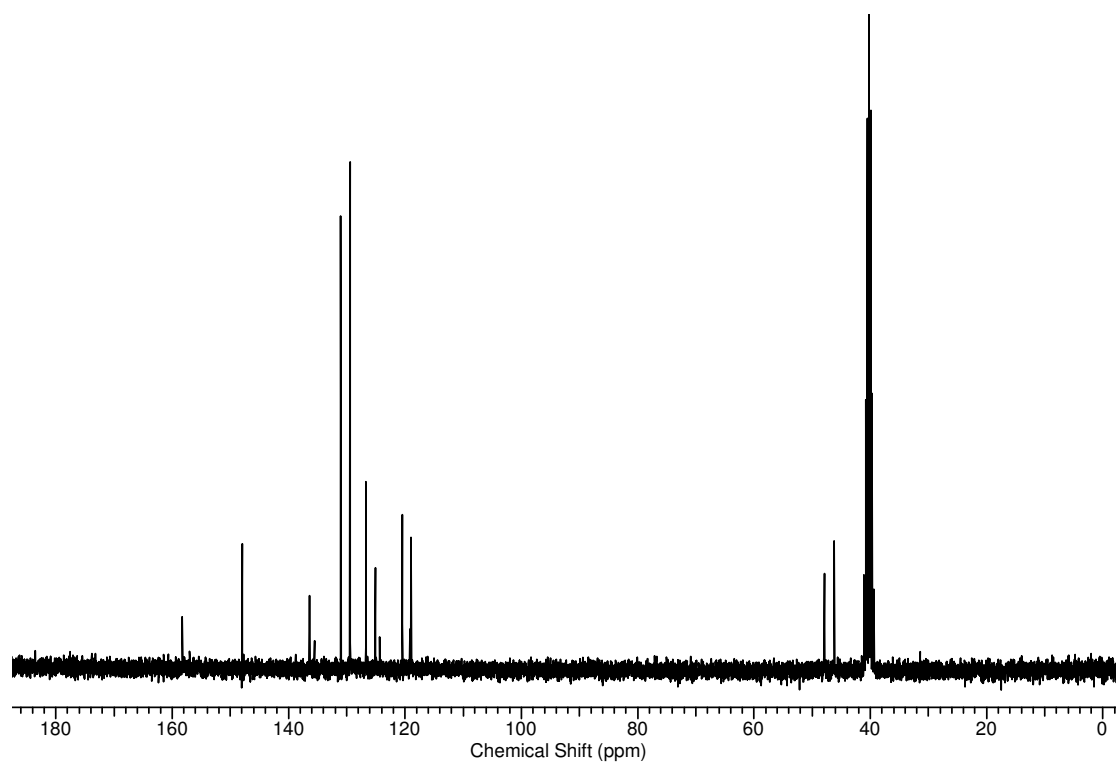

$^1\text{H}$  and  $^{13}\text{C}$  NMR spectra ( $\text{d}_6\text{-DMSO}$ ) for compound 8(1,1,3)

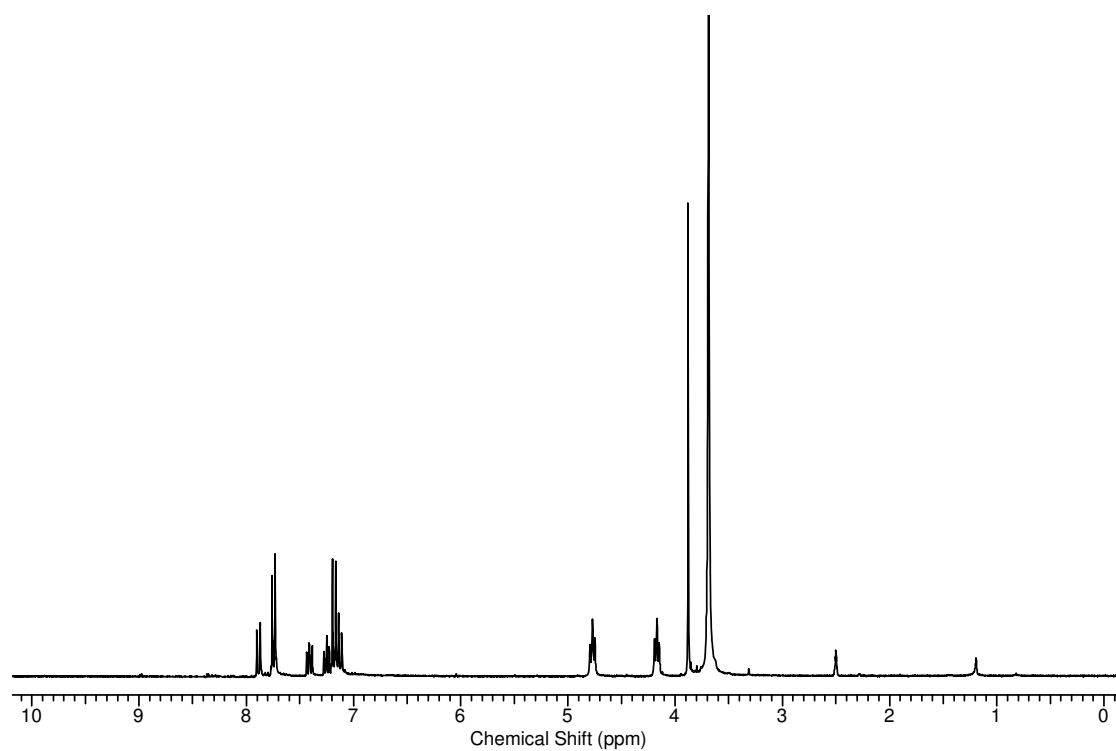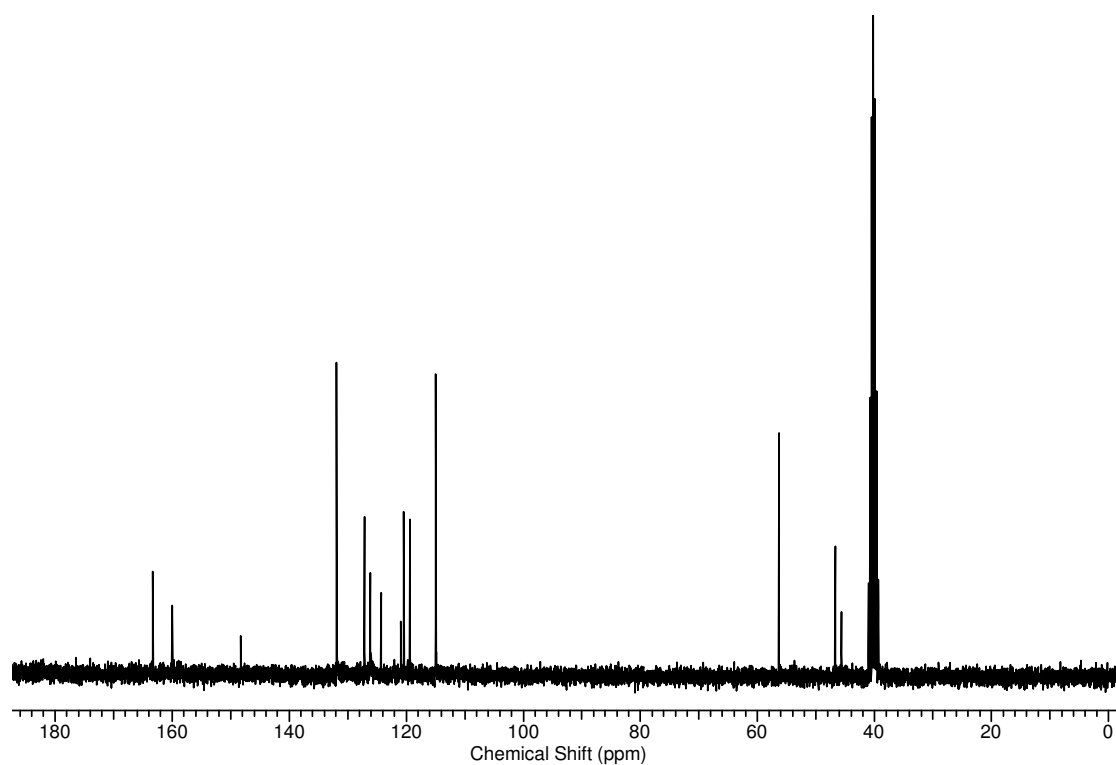

**$^1\text{H}$  and  $^{13}\text{C}$  NMR spectra ( $\text{d}_6\text{-DMSO}$ ) for compound 8(1,1,4)**

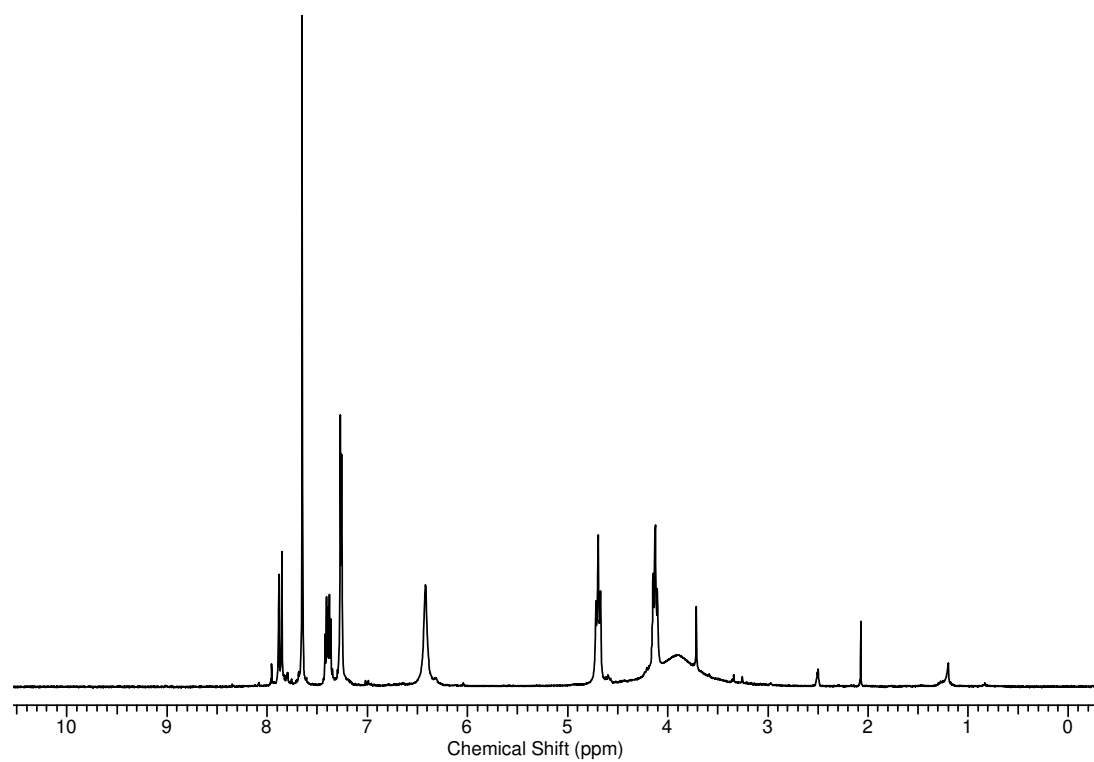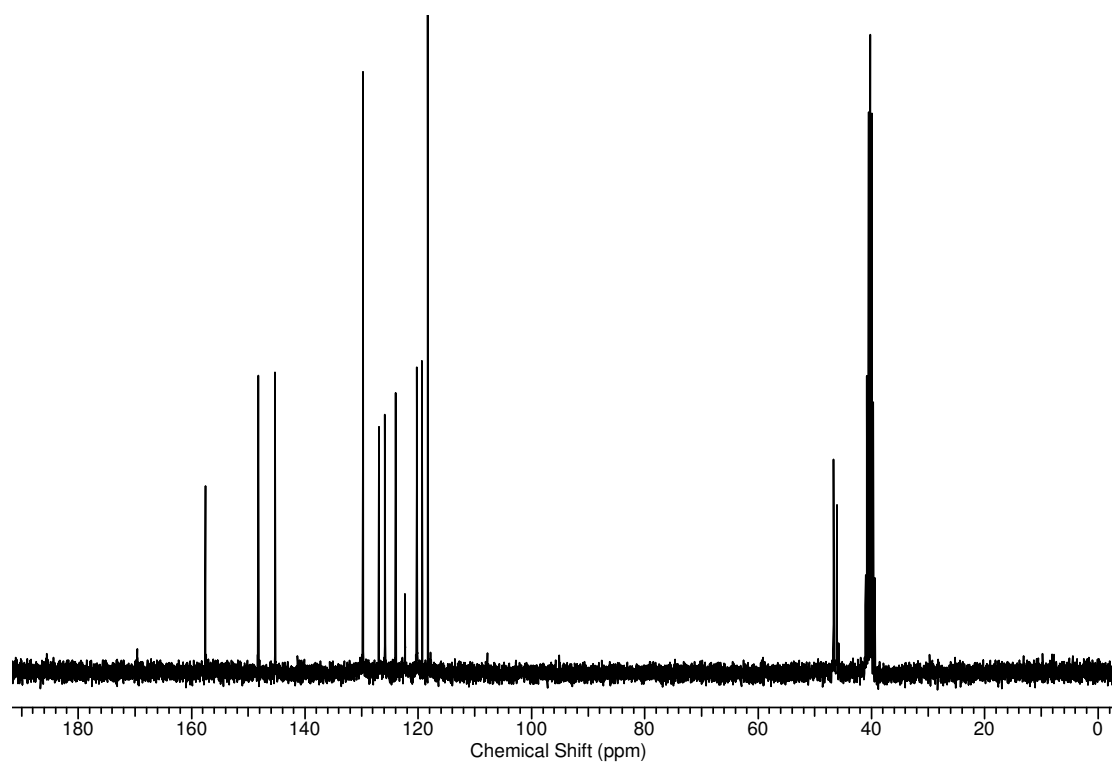

**$^1\text{H}$  and  $^{13}\text{C}$  NMR spectra ( $\text{d}_6\text{-DMSO}$ ) for compound 8(1,2,1)**

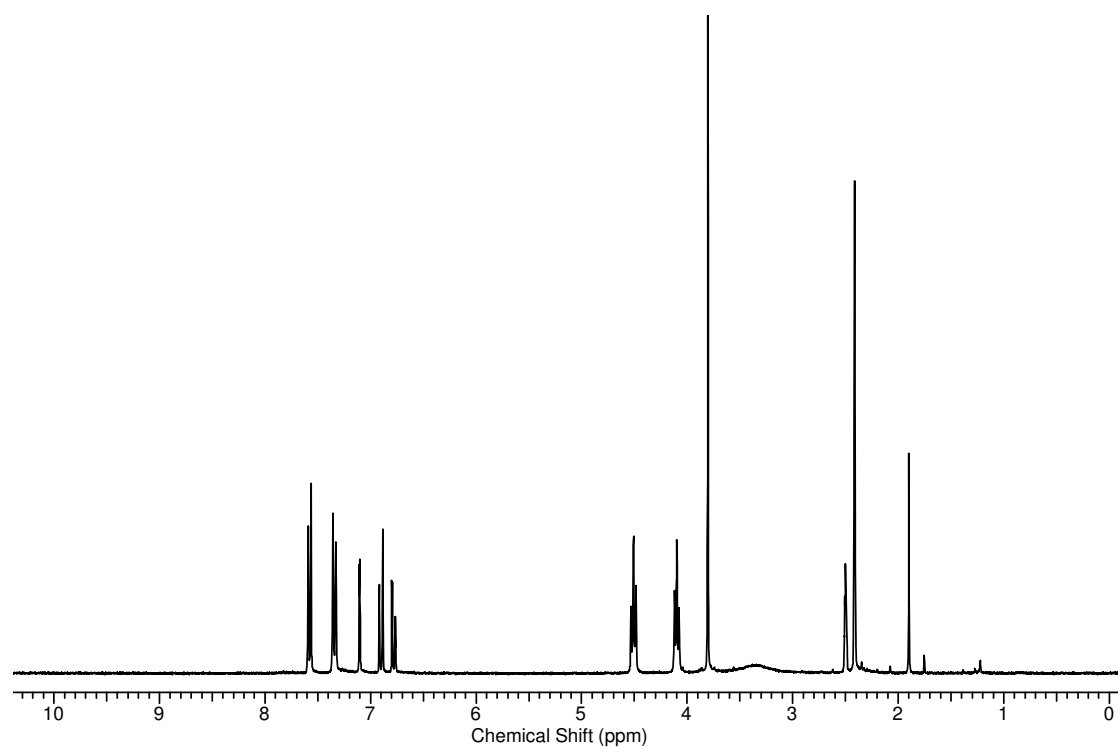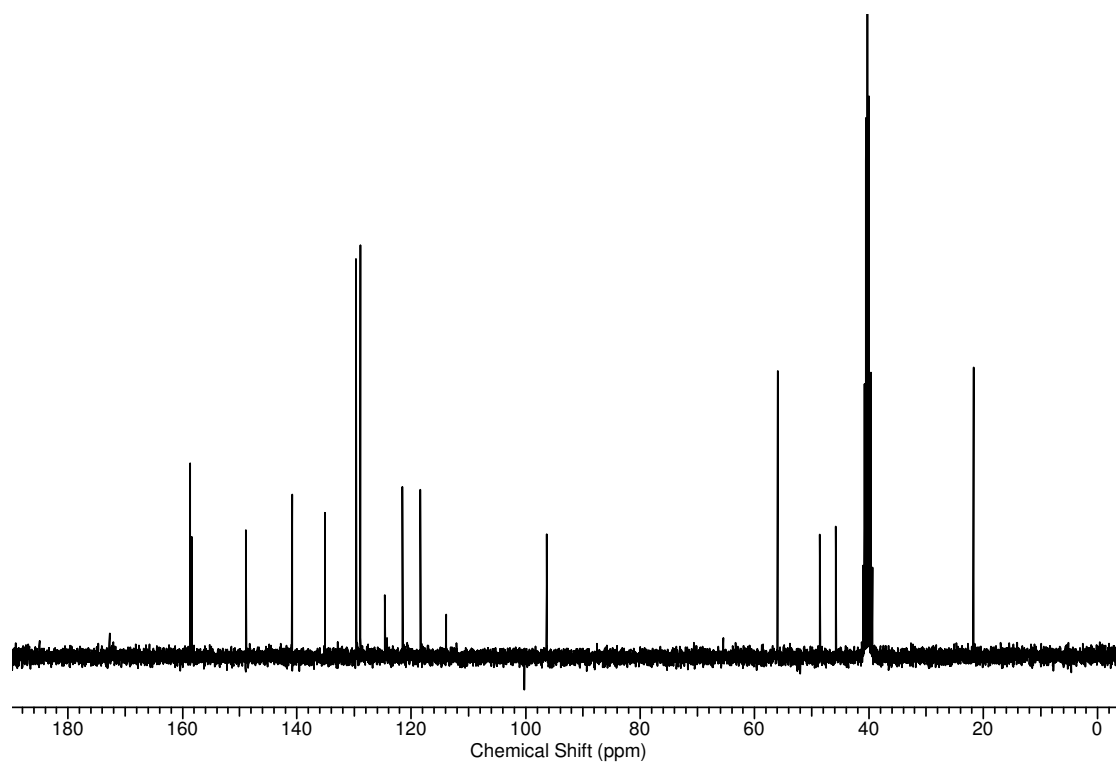

**$^1\text{H}$  and  $^{13}\text{C}$  NMR spectra (d6-DMSO) for compound 8(1,3,3)**

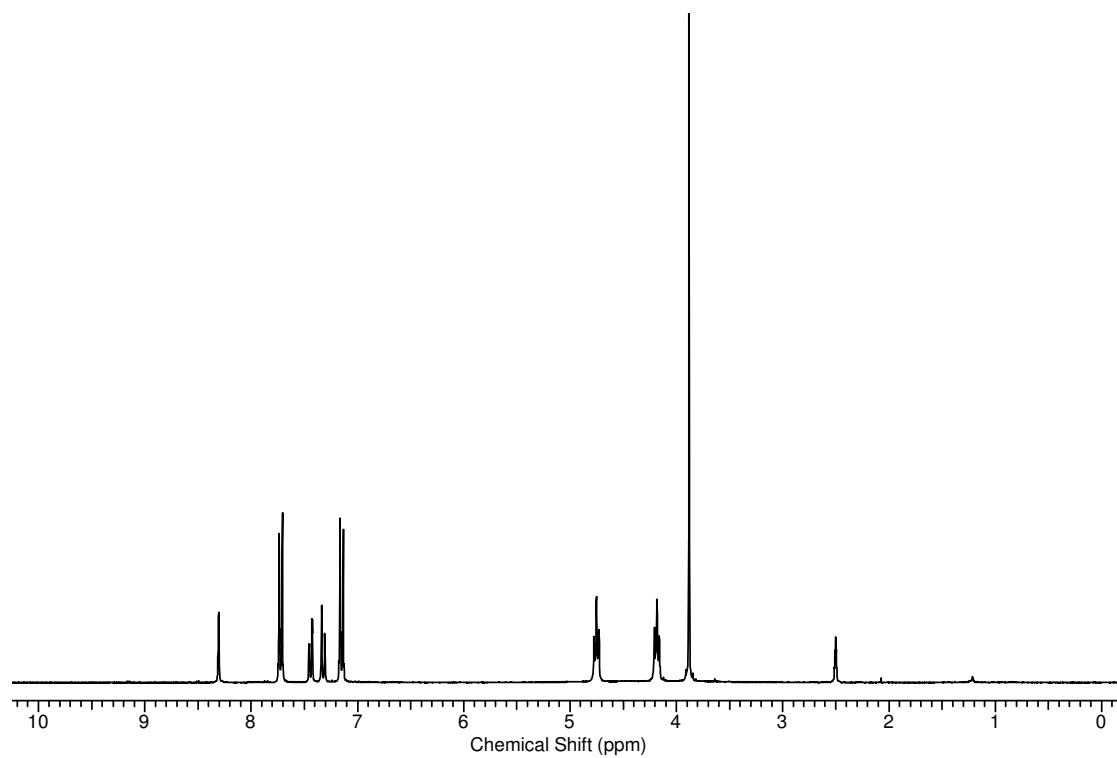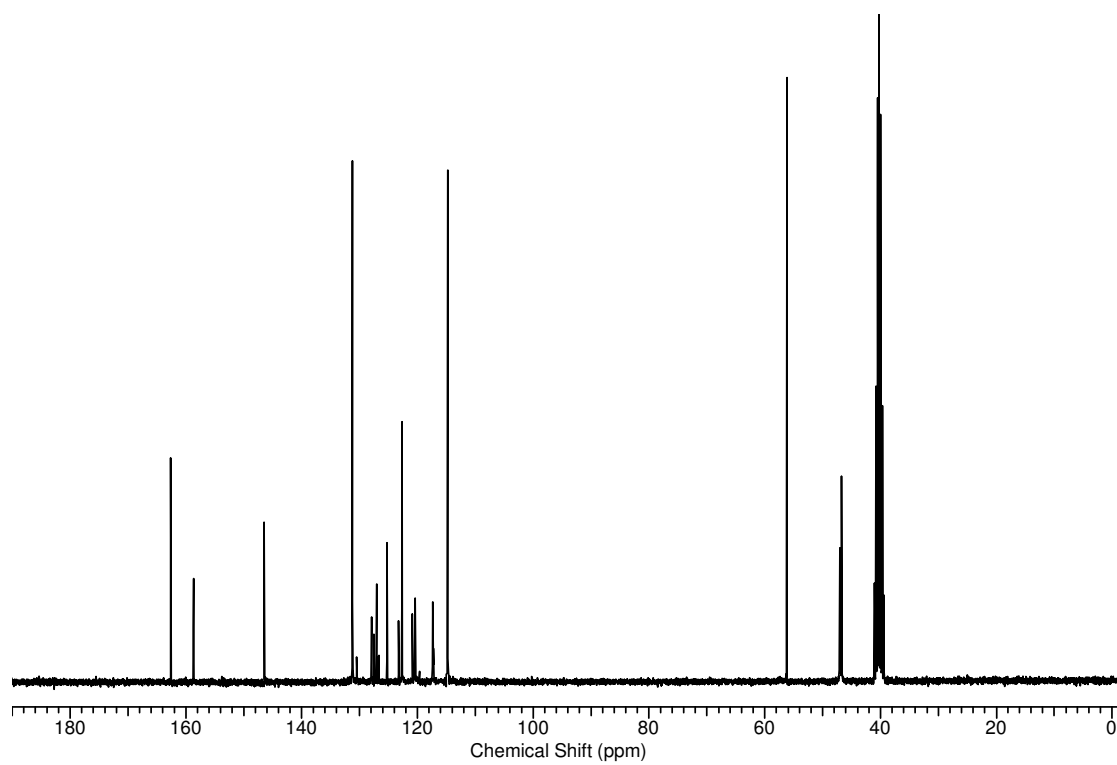



$^1\text{H}$  and  $^{13}\text{C}$  NMR spectra ( $\text{d}_6\text{-DMSO}$ ) for compound 8(1,4,1)

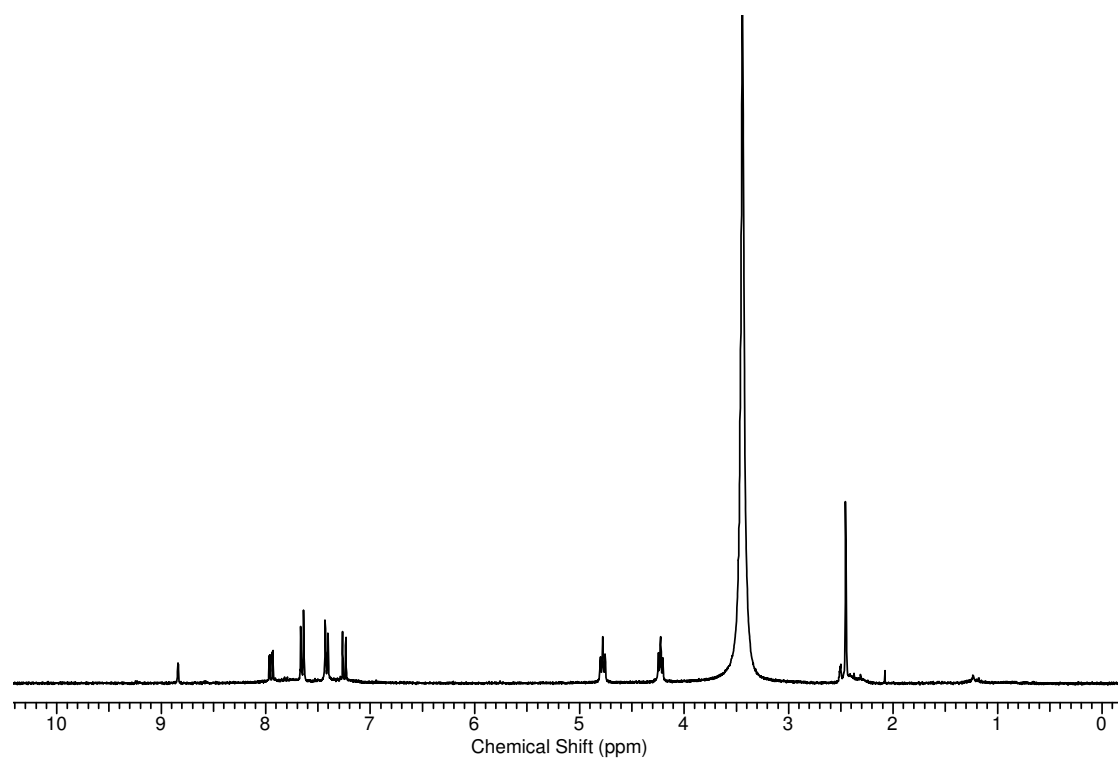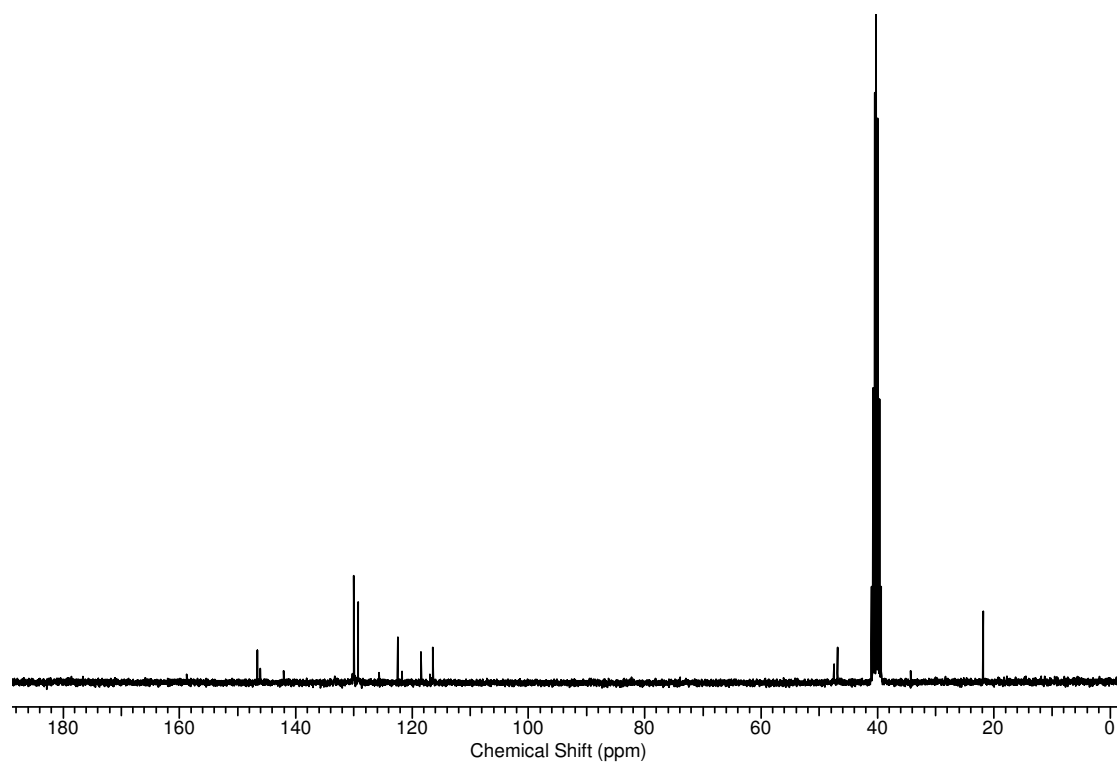

**$^1\text{H}$  and  $^{13}\text{C}$  NMR spectra ( $\text{d}_6\text{-DMSO}$ ) for compound 10(1,1,5)**

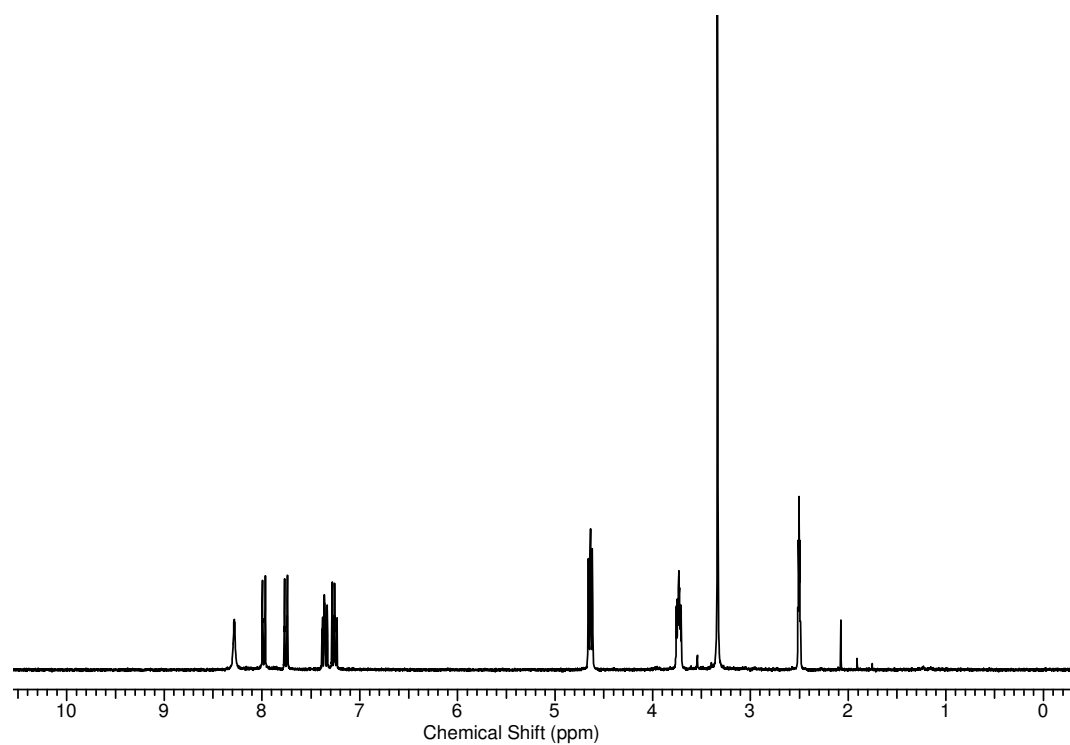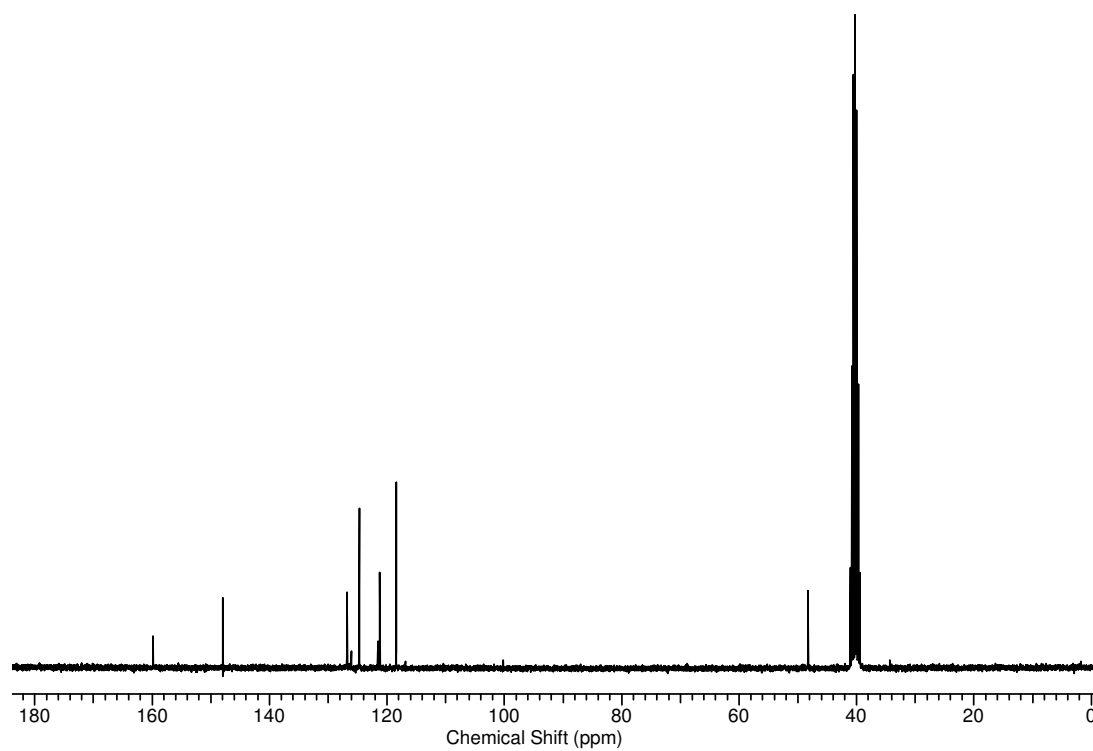

Supplement: NIHMS98531-supplement-1_si_001.pdf [file NIHMS98531-supplement-1_si_001.pdf]
